# Supplementary material for: Global distribution of Chelonid fibropapilloma-associated herpesvirus among clinically healthy sea turtles
Source: PubMed Central journal article supplement (PMC4219010; doi:10.1186/s12862-014-0206-z), 2014-10-25
Supplement: 12862_2014_206_MOESM1_ESM.pdf [file 12862_2014_206_MOESM1_ESM.pdf]

| Sea turtle population or location of<br>sample source | Species                                   | Number of analysed<br>DNA extracts | Number of<br>turtles analysed | Results from PCR CFPHV detection per locus,<br>confirmed by sequencing |           |           | Total CFPHV<br>detection in DNA<br>extracts | % of CFPHV per<br>DNA extracts |
|-------------------------------------------------------|-------------------------------------------|------------------------------------|-------------------------------|------------------------------------------------------------------------|-----------|-----------|---------------------------------------------|--------------------------------|
|                                                       |                                           |                                    |                               | UL18 (n)                                                               | UL22 (n)  | UL27 (n)  |                                             |                                |
|                                                       |                                           |                                    |                               |                                                                        |           |           |                                             |                                |
| Denmark, Danmarks Aquarium                            | <i>Caretta caretta</i>                    | 1                                  | 1                             | 1                                                                      | 0         | 1         | 1                                           | 100,0%                         |
| Denmark, Danmarks Aquarium                            | <i>Chelonia mydas</i>                     | 5                                  | 1                             | 0                                                                      | 0         | 0         | 0                                           | 0,0%                           |
| Dubai, EAU                                            | <i>Chelonia mydas</i>                     | 2                                  | 2                             | 0                                                                      | 0         | 0         | 0                                           | 0,0%                           |
| Dubai, EAU                                            | <i>Eretmochelys imbricata</i>             | 9                                  | 9                             | 0                                                                      | 0         | 0         | 0                                           | 0,0%                           |
| Dubai, EAU                                            | <i>Lepidochelys olivacea</i>              | 1                                  | 1                             | 0                                                                      | 0         | 0         | 0                                           | 0,0%                           |
| Ghana, Western Africa                                 | <i>Dermochelys coriacea</i>               | 17                                 | 17                            | 0                                                                      | 0         | 2         | 2                                           | 11,8%                          |
| Ghana, Western Africa                                 | <i>Lepidochelys olivacea</i>              | 9                                  | 9                             | 0                                                                      | 0         | 1         | 1                                           | 11,1%                          |
| Hawaii, USA, Northern Pacific                         | <i>Chelonia mydas agassizi</i>            | 51                                 | 15                            | 33                                                                     | 37        | 32        | 50                                          | 98,0%                          |
| Masirah Island, Oman                                  | <i>Caretta caretta</i>                    | 37                                 | 34                            | 0                                                                      | 0         | 0         | 0                                           | 0,0%                           |
| Masirah Island, Oman                                  | <i>Lepidochelys olivacea</i>              | 1                                  | 1                             | 0                                                                      | 0         | 0         | 0                                           | 0,0%                           |
| North Pacific, California                             | <i>Caretta caretta</i>                    | 1                                  | 1                             | 0                                                                      | 0         | 0         | 0                                           | 0,0%                           |
| Northen Cyprus, Mediterranean                         | <i>Caretta caretta</i>                    | 24                                 | 24                            | 0                                                                      | 3         | 2         | 5                                           | 20,8%                          |
| Northen Cyprus, Mediterranean                         | <i>Chelonia mydas</i>                     | 26                                 | 26                            | 0                                                                      | 3         | 2         | 5                                           | 19,2%                          |
| Ostional, Costa Rican Pacific coast                   | <i>Dermochelys coriacea</i>               | 1                                  | 1                             | 1                                                                      | 0         | 1         | 1                                           | 100,0%                         |
| Ostional, Costa Rican Pacific coast                   | <i>Lepidochelys olivacea</i>              | 9                                  | 9                             | 0                                                                      | 1         | 1         | 2                                           | 22,2%                          |
| Portugal, Northern Atlantic                           | <i>Caretta caretta</i>                    | 1                                  | 1                             | 0                                                                      | 0         | 1         | 1                                           | 100,0%                         |
| Portugal, Northern Atlantic                           | <i>Chelonia mydas</i>                     | 2                                  | 2                             | 1                                                                      | 1         | 1         | 2                                           | 100,0%                         |
| Portugal, Northern Atlantic                           | <i>Dermochelys coriacea</i>               | 2                                  | 2                             | 0                                                                      | 0         | 1         | 1                                           | 50,0%                          |
| Principe Island, Western Africa                       | <i>Chelonia mydas</i>                     | 14                                 | 7                             | 7                                                                      | 10        | 10        | 14                                          | 100,0%                         |
| Principe Island, Western Africa                       | <i>Eretmochelys imbricata</i>             | 4                                  | 4                             | 3                                                                      | 2         | 4         | 4                                           | 100,0%                         |
| Puerto Rico, Caribbean                                | <i>Chelonia mydas</i>                     | 6                                  | 6                             | 0                                                                      | 2         | 0         | 2                                           | 33,3%                          |
| Puerto Rico, Caribbean                                | <i>Eretmochelys imbricata</i>             | 5                                  | 5                             | 0                                                                      | 0         | 0         | 0                                           | 0,0%                           |
| Qaru Island, Kuwait, Persian Gulf                     | <i>Chelonia mydas</i>                     | 8                                  | 8                             | 0                                                                      | 0         | 0         | 0                                           | 0,0%                           |
| Qaru Island, Kuwait, Persian Gulf                     | <i>Eretmochelys imbricata</i>             | 10                                 | 10                            | 1                                                                      | 3         | 0         | 3                                           | 30,0%                          |
| San Diego Bay, California, Pacific                    | <i>Chelonia mydas</i>                     | 28                                 | 27                            | 0                                                                      | 6         | 2         | 8                                           | 28,6%                          |
| Tortuguero, Costa Rican Caribbean coast               | <i>Chelonia mydas</i>                     | 99                                 | 99                            | 0                                                                      | 7         | 0         | 7                                           | 7,1%                           |
| Turks & Caicos Islands, Caribbean Sea                 | <i>Chelonia mydas</i>                     | 25                                 | 15                            | 11                                                                     | 18        | 14        | 23                                          | 92,0%                          |
| <b>Total for sea turtle DNA extracts</b>              |                                           | <b>398</b>                         | <b>337</b>                    | <b>58</b>                                                              | <b>93</b> | <b>75</b> | <b>132</b>                                  | <b>33,2%</b>                   |
| <b>Tortoises and terrapins (non sea turtles)</b>      |                                           |                                    |                               |                                                                        |           |           |                                             |                                |
| Denmark, Copenhagen Zoo                               | <i>Agrionemus horsfieldii</i> (tortoise)  | 1                                  |                               | 0                                                                      | 0         | 0         | 0                                           | 0,0%                           |
| Denmark, Copenhagen Zoo                               | <i>Carettochelys insculpta</i> (terrapin) | 1                                  |                               | 0                                                                      | 0         | 0         | 0                                           | 0,0%                           |
| Denmark, Copenhagen Zoo                               | <i>Cuora amboinensis</i> (semi-terrapin)  | 1                                  |                               | 0                                                                      | 0         | 0         | 0                                           | 0,0%                           |
| Denmark, Copenhagen Zoo                               | <i>Geochelone carbonaria</i> (tortoise)   | 1                                  |                               | 0                                                                      | 0         | 0         | 0                                           | 0,0%                           |
| Denmark, Copenhagen Zoo                               | <i>Geochelone pardalis</i> (tortoise)     | 1                                  |                               | 0                                                                      | 0         | 0         | 0                                           | 0,0%                           |
| Denmark, Copenhagen Zoo                               | <i>Geochelone radiata</i> (tortoise)      | 1                                  |                               | 0                                                                      | 0         | 0         | 0                                           | 0,0%                           |
| Denmark, Copenhagen Zoo                               | <i>Indotestudo elongata</i> (tortoise)    | 2                                  |                               | 0                                                                      | 0         | 0         | 0                                           | 0,0%                           |
| Denmark, Copenhagen Zoo                               | <i>Podocnemis unifilis</i> (terrapin)     | 2                                  |                               | 0                                                                      | 0         | 0         | 0                                           | 0,0%                           |
| Denmark, Copenhagen Zoo                               | <i>Testudo greca</i> (tortoise)           | 1                                  |                               | 0                                                                      | 0         | 0         | 0                                           | 0,0%                           |

**Note: Please notice that the percentage (%) of CFPHV has been calculated upon the number of DNA extracts analysed and not the total number of individual turtles as estimated in Table 2, therefore the increase in the final percentage value**
