# Supplementary material for: Global distribution of Chelonid fibropapilloma-associated herpesvirus among clinically healthy sea turtles
Source: PubMed Central journal article supplement (PMC4219010; doi:10.1186/s12862-014-0206-z), 2014-10-25
Supplement: 12862_2014_206_MOESM2_ESM.pdf [file 12862_2014_206_MOESM2_ESM.pdf]

| Species common name                                | Sea turtle population or location of sample source | Number of turtle individuals analysed | Results from PCR CFPV detection by type of tissue |                |            | Total turtles detected | % of CFPV detection by turtle species |
|----------------------------------------------------|----------------------------------------------------|---------------------------------------|---------------------------------------------------|----------------|------------|------------------------|---------------------------------------|
|                                                    |                                                    |                                       | FP exhibiting                                     | healthy + CFPV | CFPV free  |                        |                                       |
|                                                    |                                                    |                                       | CFPV positive                                     |                |            |                        |                                       |
| <i>Chelonia mydas</i>                              | Denmark, Danmarks Aquarium                         | 1                                     | 0                                                 | 0              | 1          | 0                      | 0,0%                                  |
| <i>Chelonia mydas</i>                              | Dubai, EAU                                         | 2                                     | 0                                                 | 0              | 2          | 0                      | 0,0%                                  |
| <i>Chelonia mydas</i>                              | Northern Cyprus, Mediterranean                     | 26                                    | 0                                                 | 5              | 21         | 5                      | 19,2%                                 |
| <i>Chelonia mydas</i>                              | Portugal, Northern Atlantic                        | 2                                     | 0                                                 | 2              | 0          | 2                      | 100,0%                                |
| <i>Chelonia mydas</i>                              | Principe Island, Western Africa                    | 7                                     | 7                                                 | 0              | 0          | 7                      | 100,0%                                |
| <i>Chelonia mydas</i>                              | Puerto Rico, Caribbean                             | 6                                     | 0                                                 | 2              | 4          | 2                      | 33,3%                                 |
| <i>Chelonia mydas</i>                              | Qaru Island, Kuwait, Persian Gulf                  | 8                                     | 0                                                 | 0              | 8          | 0                      | 0,0%                                  |
| <i>Chelonia mydas</i>                              | San Diego Bay, California, Pacific                 | 27                                    | 0                                                 | 8              | 19         | 8                      | 29,6%                                 |
| <i>Chelonia mydas</i>                              | Tortuguero, Costa Rican Caribbean coast            | 99                                    | 0                                                 | 7              | 92         | 7                      | 7,1%                                  |
| <i>Chelonia mydas</i>                              | Turks & Caicos Islands, Caribbean Sea              | 15                                    | 15                                                | 0              | 0          | 15                     | 100,0%                                |
| <i>Chelonia mydas agassizi</i>                     | Hawaii, USA, Northern Pacific                      | 15                                    | 15                                                | 0              | 0          | 15                     | 100,0%                                |
| <b>Total per Green (Cm) species</b>                |                                                    | <b>208</b>                            | <b>37</b>                                         | <b>24</b>      | <b>147</b> | <b>61</b>              | <b>29,3%</b>                          |
| <i>Caretta caretta</i>                             | Denmark, Danmarks Aquarium                         | 1                                     | 0                                                 | 1              | 0          | 1                      | 100,0%                                |
| <i>Caretta caretta</i>                             | Masirah Island, Oman                               | 34                                    | 0                                                 | 0              | 34         | 0                      | 0,0%                                  |
| <i>Caretta caretta</i>                             | North Pacific, California                          | 1                                     | 0                                                 | 0              | 1          | 0                      | 0,0%                                  |
| <i>Caretta caretta</i>                             | Northern Cyprus, Mediterranean                     | 24                                    | 0                                                 | 5              | 19         | 5                      | 20,8%                                 |
| <i>Caretta caretta</i>                             | Portugal, Northern Atlantic                        | 1                                     | 0                                                 | 1              | 0          | 1                      | 100,0%                                |
| <b>Total per Loggerhead (Cc) species</b>           |                                                    | <b>61</b>                             | <b>0</b>                                          | <b>7</b>       | <b>54</b>  | <b>7</b>               | <b>11,5%</b>                          |
| <i>Dermochelys coriacea</i>                        | Ghana, Western Africa                              | 17                                    | 0                                                 | 2              | 15         | 2                      | 11,8%                                 |
| <i>Dermochelys coriacea</i>                        | Ostional, Costa Rican Pacific coast                | 1                                     | 0                                                 | 1              | 0          | 1                      | 100,0%                                |
| <i>Dermochelys coriacea</i>                        | Portugal, Northern Atlantic                        | 2                                     | 0                                                 | 1              | 1          | 1                      | 50,0%                                 |
| <b>Total per Leatherback (Dc) species</b>          |                                                    | <b>20</b>                             | <b>0</b>                                          | <b>4</b>       | <b>16</b>  | <b>4</b>               | <b>20,0%</b>                          |
| <i>Eretmochelys imbricata</i>                      | Dubai, EAU                                         | 9                                     | 0                                                 | 0              | 9          | 0                      | 0,0%                                  |
| <i>Eretmochelys imbricata</i>                      | Principe Island, Western Africa                    | 4                                     | 0                                                 | 4              | 0          | 4                      | 100,0%                                |
| <i>Eretmochelys imbricata</i>                      | Puerto Rico, Caribbean                             | 5                                     | 0                                                 | 0              | 5          | 0                      | 0,0%                                  |
| <i>Eretmochelys imbricata</i>                      | Qaru Island, Kuwait, Persian Gulf                  | 10                                    | 0                                                 | 3              | 7          | 3                      | 30,0%                                 |
| <b>Total per Hawksbill (Ei) species</b>            |                                                    | <b>28</b>                             | <b>0</b>                                          | <b>7</b>       | <b>21</b>  | <b>7</b>               | <b>25,0%</b>                          |
| <i>Lepidochelys olivacea</i>                       | Dubai, EAU                                         | 1                                     | 0                                                 | 0              | 1          | 0                      | 0,0%                                  |
| <i>Lepidochelys olivacea</i>                       | Ghana, Western Africa                              | 9                                     | 0                                                 | 1              | 8          | 1                      | 11,1%                                 |
| <i>Lepidochelys olivacea</i>                       | Masirah Island, Oman                               | 1                                     | 0                                                 | 0              | 1          | 0                      | 0,0%                                  |
| <i>Lepidochelys olivacea</i>                       | Ostional, Costa Rican Pacific coast                | 9                                     | 0                                                 | 2              | 7          | 2                      | 22,2%                                 |
| <b>Total per Olive Ridley (Lo) species</b>         |                                                    | <b>20</b>                             | <b>0</b>                                          | <b>3</b>       | <b>17</b>  | <b>3</b>               | <b>15,0%</b>                          |
| <b>Grand total sea turtle individuals analysed</b> |                                                    | <b>337</b>                            | <b>37</b>                                         | <b>45</b>      | <b>255</b> | <b>82</b>              | <b>24,3%</b>                          |
