# Supplementary material for: Global distribution of Chelonid fibropapilloma-associated herpesvirus among clinically healthy sea turtles
Source: PubMed Central journal article supplement (PMC4219010; doi:10.1186/s12862-014-0206-z), 2014-10-25

- UL18
- 0
  - 1
  - 2
  - 5
  - 6
  - 8
  - 16
  - 17
  - 90
  - 993

A

# UL18 global

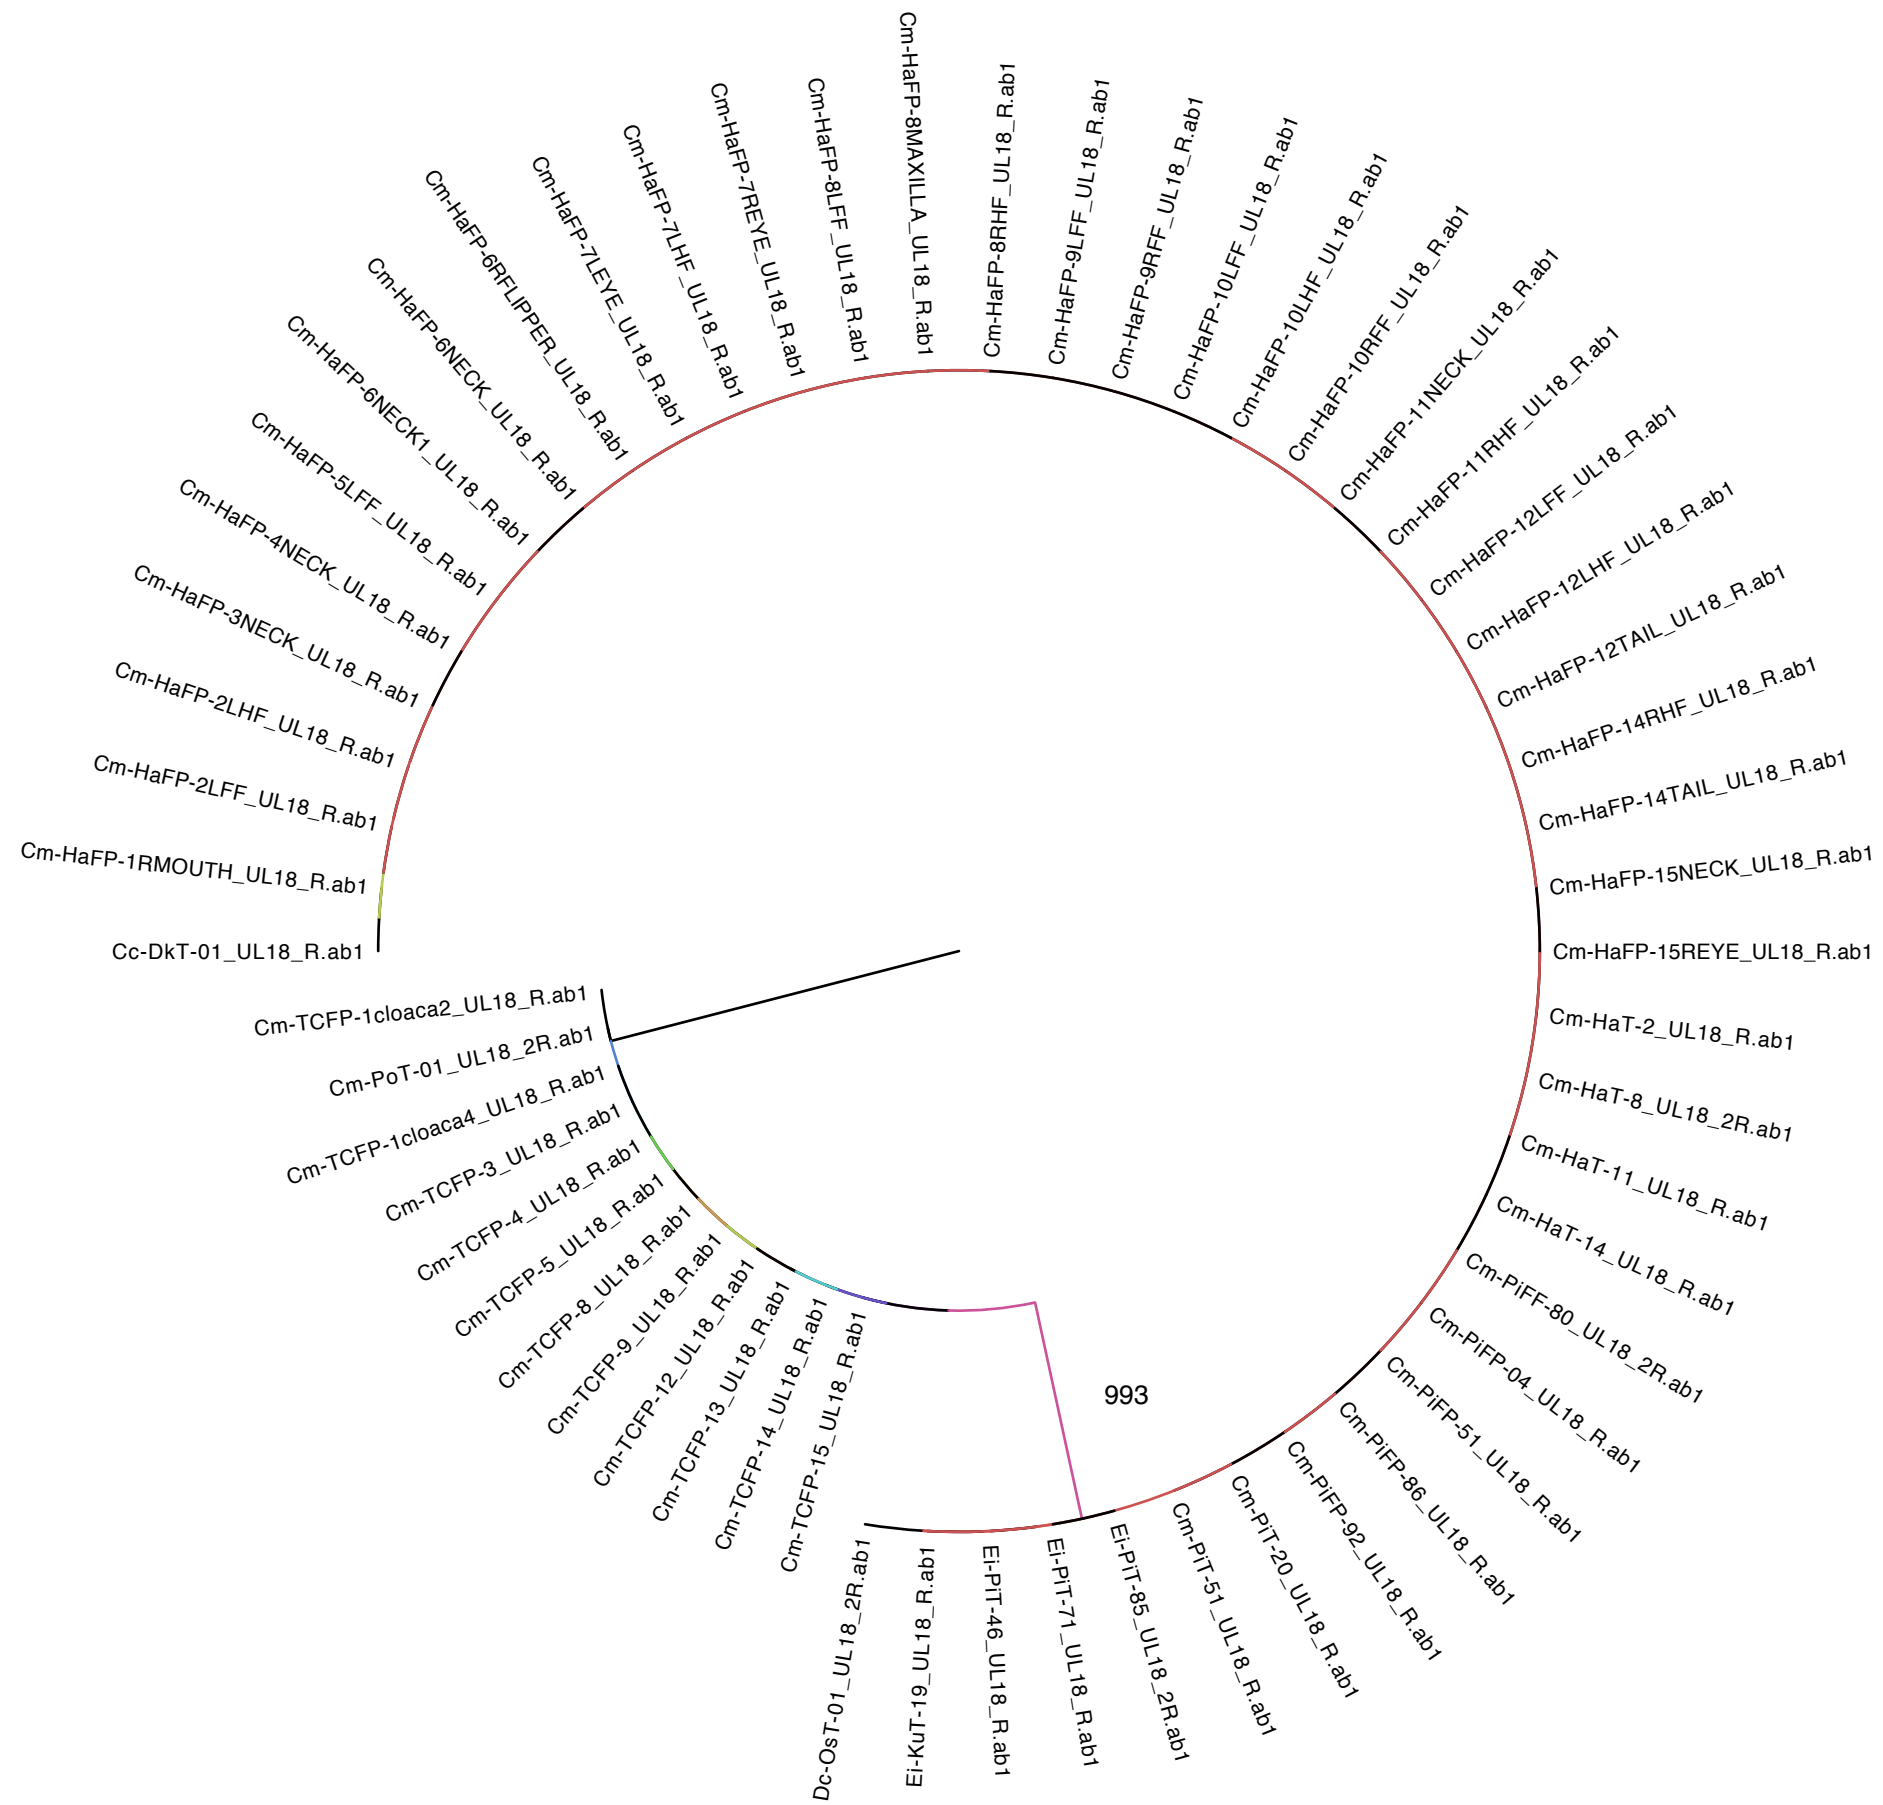

- 0
- 1
- 2
- 3
- 4
- 9
- 13
- 71
- 864

# B

# UL22 global

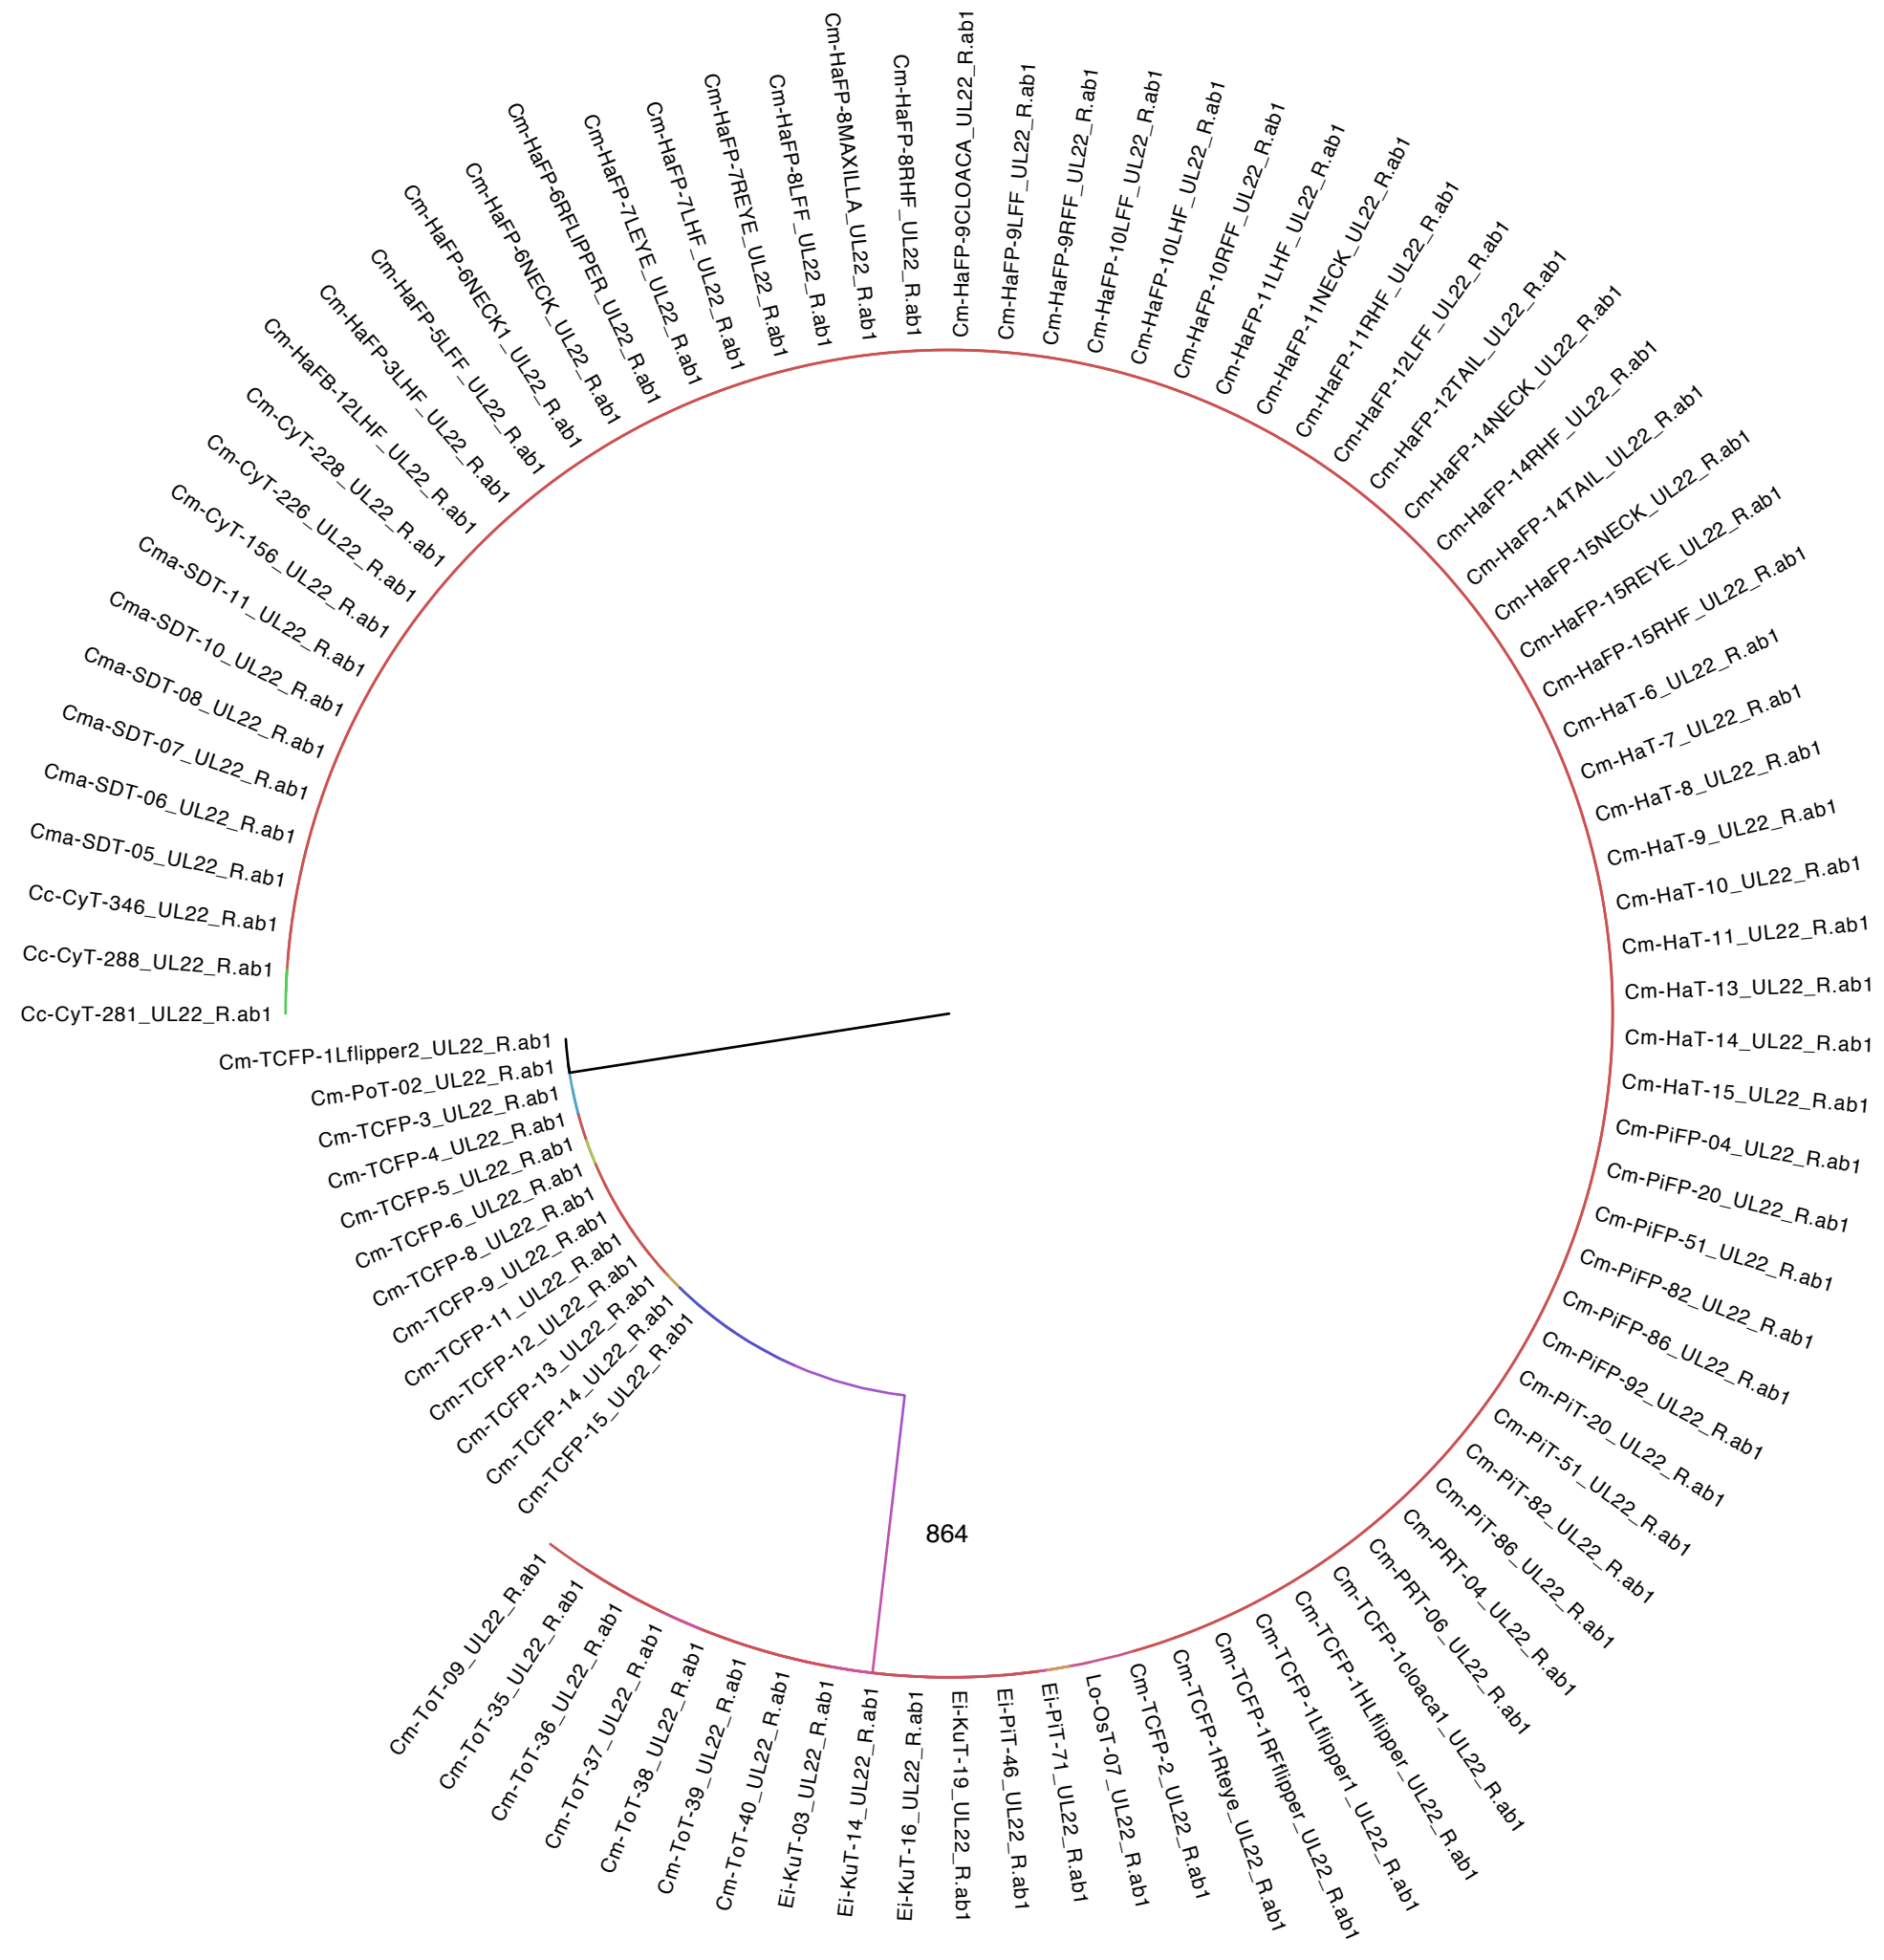

Supplement: 12862_2014_206_MOESM5_ESM.pdf [file 12862_2014_206_MOESM5_ESM.pdf]
