# Supplementary material for: Global distribution of Chelonid fibropapilloma-associated herpesvirus among clinically healthy sea turtles
Source: PubMed Central journal article supplement (PMC4219010; doi:10.1186/s12862-014-0206-z), 2014-10-25

# UL27 global + GenBank

UL27

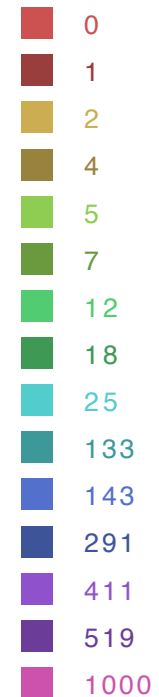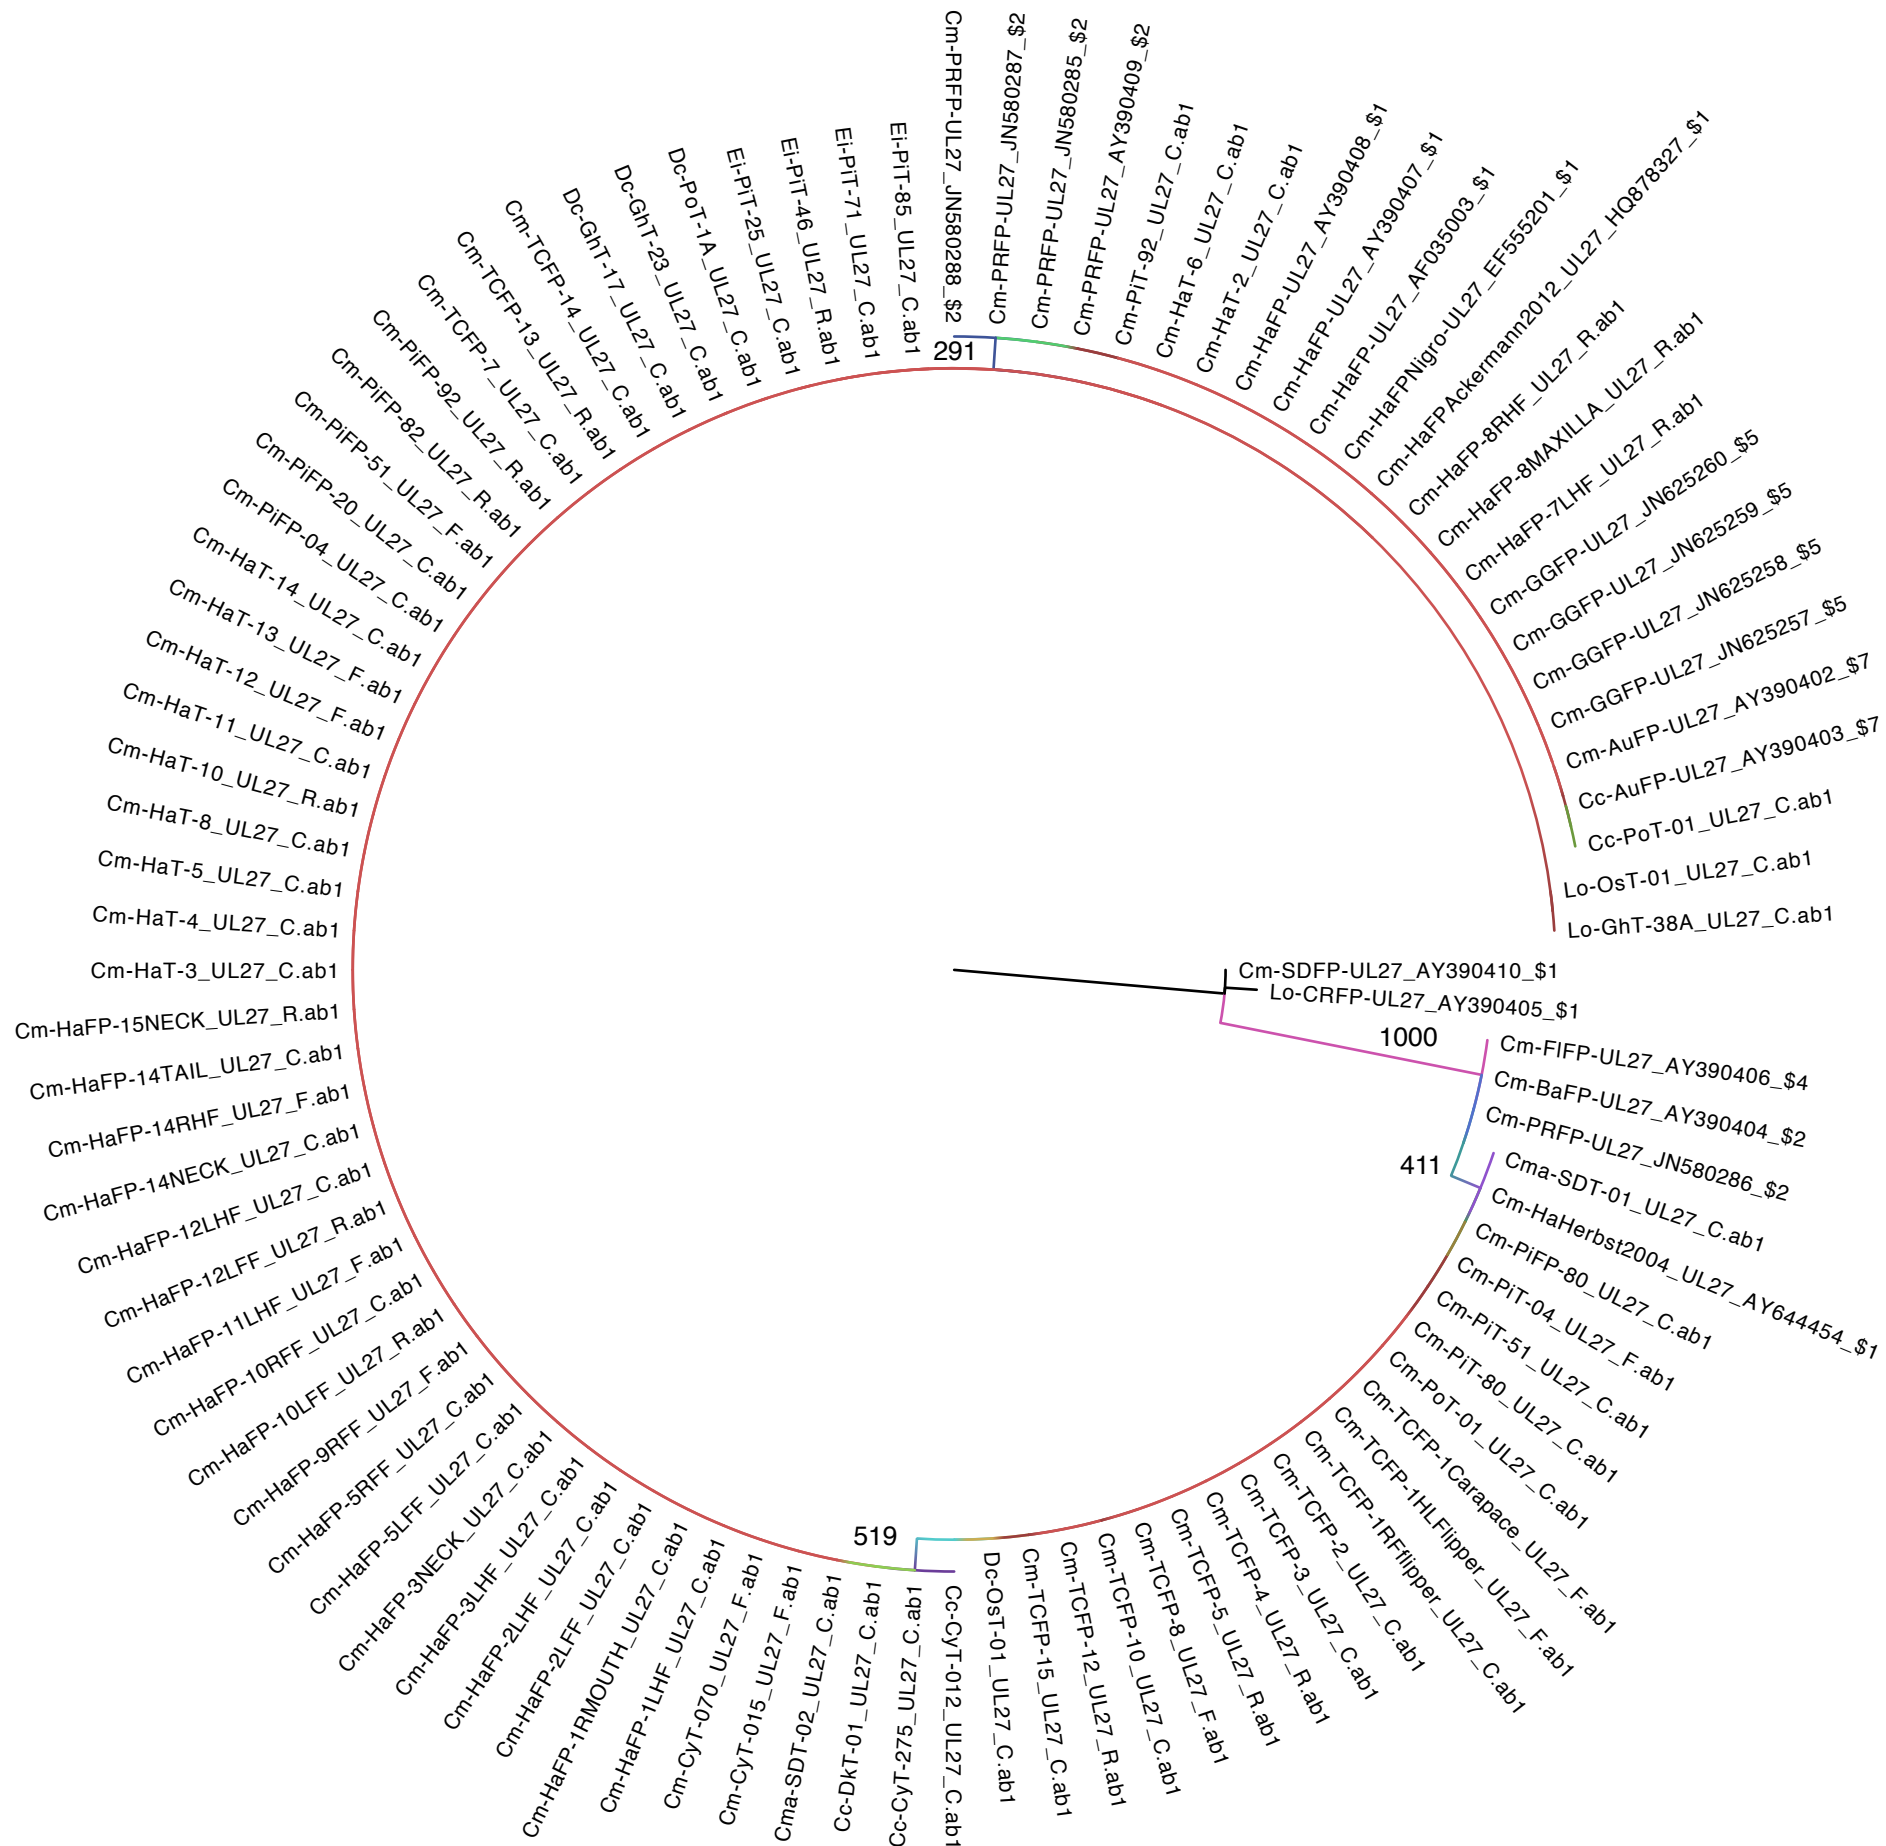

Supplement: 12862_2014_206_MOESM6_ESM.pdf [file 12862_2014_206_MOESM6_ESM.pdf]
