# Supplementary material for: Global distribution of Chelonid fibropapilloma-associated herpesvirus among clinically healthy sea turtles
Source: PubMed Central journal article supplement (PMC4219010; doi:10.1186/s12862-014-0206-z), 2014-10-25
Supplement: 12862_2014_206_MOESM7_ESM.pdf [file 12862_2014_206_MOESM7_ESM.pdf]

| Sample Code       | Species                                         | Type of sample             | Sample origin site (population)  | Viral detection by PCR assays |                                                                             |                       |                                                                             |                       |                                                                             |
|-------------------|-------------------------------------------------|----------------------------|----------------------------------|-------------------------------|-----------------------------------------------------------------------------|-----------------------|-----------------------------------------------------------------------------|-----------------------|-----------------------------------------------------------------------------|
|                   |                                                 |                            |                                  | Singleplex primer set         | Confirmed DNA sequence (F= forward, R=reverse, C=consensus of both F and R) | Singleplex primer set | Confirmed DNA sequence (F= forward, R=reverse, C=consensus of both F and R) | Singleplex primer set | Confirmed DNA sequence (F= forward, R=reverse, C=consensus of both F and R) |
|                   |                                                 |                            |                                  | UL18 (140bp)                  | C                                                                           | UL22 (179bp)          | C                                                                           | UL27 (143bp)          | C                                                                           |
| Cc-DkT-01         | loggerhead ( <i>Caretta caretta</i> )           | tissue                     | Denmark-Portugal, North Atlantic | +                             | C                                                                           | -                     | C                                                                           | +                     | C                                                                           |
| Ah-DkT-1          | <i>Agroniemus horsfieldii</i> (non sea turtle)  | tissue                     | Denmark, Copenhagen Zoo          | -                             |                                                                             | -                     |                                                                             | -                     |                                                                             |
| Ca-DkT-1          | <i>Cuora amboinensis</i> (non sea turtle)       | tissue                     | Denmark, Copenhagen Zoo          | -                             |                                                                             | -                     |                                                                             | -                     |                                                                             |
| Ci-DkT-1          | <i>Carettochelys insculpta</i> (non sea turtle) | tissue                     | Denmark, Copenhagen Zoo          | -                             |                                                                             | -                     |                                                                             | -                     |                                                                             |
| Gc-DkLe-1         | <i>Geochelone carbonaria</i> (non sea turtle)   | tissue lever               | Denmark, Copenhagen Zoo          | -                             |                                                                             | -                     |                                                                             | -                     |                                                                             |
| Gp-DkT-1          | <i>Geochelone pardalis</i> (non sea turtle)     | tissue                     | Denmark, Copenhagen Zoo          | -                             |                                                                             | -                     |                                                                             | -                     |                                                                             |
| Gr-DtT-1          | <i>Geochelone radiata</i> (non sea turtle)      | tissue                     | Denmark, Copenhagen Zoo          | -                             |                                                                             | -                     |                                                                             | -                     |                                                                             |
| Ie-DkT-1          | <i>Indotestudo elongata</i> (non sea turtle)    | tissue                     | Denmark, Copenhagen Zoo          | -                             |                                                                             | -                     |                                                                             | -                     |                                                                             |
| Ie-DkT-2          | <i>Indotestudo elongata</i> (non sea turtle)    | tissue                     | Denmark, Copenhagen Zoo          | -                             |                                                                             | -                     |                                                                             | -                     |                                                                             |
| Pu-DkLe-2         | <i>Podocnemis unifilis</i> (non sea turtle)     | tissue lever               | Denmark, Copenhagen Zoo          | -                             |                                                                             | -                     |                                                                             | -                     |                                                                             |
| Pu-DkT-1          | <i>Podocnemis unifilis</i> (non sea turtle)     | tissue                     | Denmark, Copenhagen Zoo          | -                             |                                                                             | -                     |                                                                             | -                     |                                                                             |
| Tg-DkT-1          | <i>Testudo greca</i> (non sea turtle)           | tissue                     | Denmark, Copenhagen Zoo          | -                             |                                                                             | -                     |                                                                             | -                     |                                                                             |
| Cm-DkT-01cyststom | green ( <i>Chelonia mydas</i> )                 | tissue of cyst in stomach  | Denmark, Danish aquarium         | -                             |                                                                             | -                     |                                                                             | -                     |                                                                             |
| Cm-DkT-01liver    | green ( <i>Chelonia mydas</i> )                 | tissue very bloody         | Denmark, Danish aquarium         | -                             |                                                                             | -                     |                                                                             | -                     |                                                                             |
| Cm-DkT-01mouth    | green ( <i>Chelonia mydas</i> )                 | tissue                     | Denmark, Danish aquarium         | -                             |                                                                             | -                     |                                                                             | -                     |                                                                             |
| Cm-DkT-01neck     | green ( <i>Chelonia mydas</i> )                 | tissue                     | Denmark, Danish aquarium         | -                             |                                                                             | -                     |                                                                             | -                     |                                                                             |
| Cm-DkT-01rearLF   | green ( <i>Chelonia mydas</i> )                 | tissue                     | Denmark, Danish aquarium         | -                             |                                                                             | -                     |                                                                             | -                     |                                                                             |
| Cm-DbT-01         | green ( <i>Chelonia mydas</i> )                 | tissue front flipper       | Dubai Aquarium, EAU              | -                             |                                                                             | -                     |                                                                             | -                     |                                                                             |
| Cm-DbT-02         | green ( <i>Chelonia mydas</i> )                 | tissue front flipper       | Dubai Aquarium, EAU              | -                             |                                                                             | -                     |                                                                             | -                     |                                                                             |
| Ei-DbT-01         | hawkbill ( <i>Eretmochelys imbricata</i> )      | tissue front flipper       | Dubai Aquarium, EAU              | -                             |                                                                             | -                     |                                                                             | -                     |                                                                             |
| Ei-DbT-02         | hawkbill ( <i>Eretmochelys imbricata</i> )      | tissue front flipper       | Dubai Aquarium, EAU              | -                             |                                                                             | -                     |                                                                             | -                     |                                                                             |
| Ei-DbT-03         | hawkbill ( <i>Eretmochelys imbricata</i> )      | tissue front flipper       | Dubai Aquarium, EAU              | -                             |                                                                             | -                     |                                                                             | -                     |                                                                             |
| Ei-DbT-04         | hawkbill ( <i>Eretmochelys imbricata</i> )      | tissue front flipper       | Dubai Aquarium, EAU              | -                             |                                                                             | -                     |                                                                             | -                     |                                                                             |
| Ei-DbT-05         | hawkbill ( <i>Eretmochelys imbricata</i> )      | tissue front flipper       | Dubai Aquarium, EAU              | -                             |                                                                             | -                     |                                                                             | -                     |                                                                             |
| Ei-DbT-06         | hawkbill ( <i>Eretmochelys imbricata</i> )      | tissue front flipper       | Dubai Aquarium, EAU              | -                             |                                                                             | -                     |                                                                             | -                     |                                                                             |
| Ei-DbT-07         | hawkbill ( <i>Eretmochelys imbricata</i> )      | tissue front flipper       | Dubai Aquarium, EAU              | -                             |                                                                             | -                     |                                                                             | -                     |                                                                             |
| Ei-DbT-08         | hawkbill ( <i>Eretmochelys imbricata</i> )      | tissue front flipper       | Dubai Aquarium, EAU              | -                             |                                                                             | -                     |                                                                             | -                     |                                                                             |
| Ei-DbT-09         | hawkbill ( <i>Eretmochelys imbricata</i> )      | tissue front flipper       | Dubai Aquarium, EAU              | -                             |                                                                             | -                     |                                                                             | -                     |                                                                             |
| Lo-DbT-01         | olive ridley ( <i>Lepidochelys olivacea</i> )   | tissue front flipper       | Dubai Aquarium, EAU              | -                             |                                                                             | -                     |                                                                             | -                     |                                                                             |
| Dc-GhT-01         | leatherback ( <i>Dermochelys coriacea</i> )     | tissue rear flipper        | Ghana, West coast of Africa      | -                             |                                                                             | -                     |                                                                             | -                     |                                                                             |
| Dc-GhT-02         | leatherback ( <i>Dermochelys coriacea</i> )     | tissue rear flipper        | Ghana, West coast of Africa      | -                             |                                                                             | -                     |                                                                             | -                     |                                                                             |
| Dc-GhT-03         | leatherback ( <i>Dermochelys coriacea</i> )     | tissue rear flipper        | Ghana, West coast of Africa      | -                             |                                                                             | -                     |                                                                             | -                     |                                                                             |
| Dc-GhT-04         | leatherback ( <i>Dermochelys coriacea</i> )     | tissue rear flipper        | Ghana, West coast of Africa      | -                             |                                                                             | -                     |                                                                             | -                     |                                                                             |
| Dc-GhT-05         | leatherback ( <i>Dermochelys coriacea</i> )     | tissue rear flipper        | Ghana, West coast of Africa      | -                             |                                                                             | -                     |                                                                             | -                     |                                                                             |
| Dc-GhT-08         | leatherback ( <i>Dermochelys coriacea</i> )     | tissue rear flipper        | Ghana, West coast of Africa      | -                             |                                                                             | -                     |                                                                             | -                     |                                                                             |
| Dc-GhT-09         | leatherback ( <i>Dermochelys coriacea</i> )     | tissue rear flipper        | Ghana, West coast of Africa      | -                             |                                                                             | -                     |                                                                             | -                     |                                                                             |
| Dc-GhT-11         | leatherback ( <i>Dermochelys coriacea</i> )     | tissue rear flipper        | Ghana, West coast of Africa      | -                             |                                                                             | -                     |                                                                             | -                     |                                                                             |
| Dc-GhT-13B        | leatherback ( <i>Dermochelys coriacea</i> )     | tissue rear flipper        | Ghana, West coast of Africa      | -                             |                                                                             | -                     |                                                                             | -                     |                                                                             |
| Dc-GhT-14A        | leatherback ( <i>Dermochelys coriacea</i> )     | tissue rear flipper        | Ghana, West coast of Africa      | -                             |                                                                             | -                     |                                                                             | -                     |                                                                             |
| Dc-GhT-17         | leatherback ( <i>Dermochelys coriacea</i> )     | tissue rear flipper        | Ghana, West coast of Africa      | -                             |                                                                             | -                     |                                                                             | +                     | C                                                                           |
| Dc-GhT-18         | leatherback ( <i>Dermochelys coriacea</i> )     | tissue rear flipper        | Ghana, West coast of Africa      | -                             |                                                                             | -                     |                                                                             | -                     |                                                                             |
| Dc-GhT-21         | leatherback ( <i>Dermochelys coriacea</i> )     | tissue rear flipper        | Ghana, West coast of Africa      | -                             |                                                                             | -                     |                                                                             | -                     |                                                                             |
| Dc-GhT-21X        | leatherback ( <i>Dermochelys coriacea</i> )     | tissue rear flipper        | Ghana, West coast of Africa      | -                             |                                                                             | -                     |                                                                             | -                     |                                                                             |
| Dc-GhT-22         | leatherback ( <i>Dermochelys coriacea</i> )     | tissue rear flipper        | Ghana, West coast of Africa      | -                             |                                                                             | -                     |                                                                             | -                     |                                                                             |
| Dc-GhT-23         | leatherback ( <i>Dermochelys coriacea</i> )     | tissue rear flipper        | Ghana, West coast of Africa      | -                             |                                                                             | -                     |                                                                             | +                     | C                                                                           |
| Dc-GhT-24A        | leatherback ( <i>Dermochelys coriacea</i> )     | tissue rear flipper        | Ghana, West coast of Africa      | -                             |                                                                             | -                     |                                                                             | -                     |                                                                             |
| Lo-GhT-37         | olive ridley ( <i>Lepidochelys olivacea</i> )   | tissue                     | Ghana, West coast of Africa      | -                             |                                                                             | -                     |                                                                             | -                     |                                                                             |
| Lo-GhT-38A        | olive ridley ( <i>Lepidochelys olivacea</i> )   | tissue                     | Ghana, West coast of Africa      | -                             |                                                                             | -                     |                                                                             | +                     | C                                                                           |
| Lo-GhT-38B28      | olive ridley ( <i>Lepidochelys olivacea</i> )   | tissue                     | Ghana, West coast of Africa      | -                             |                                                                             | -                     |                                                                             | -                     |                                                                             |
| Lo-GhT-39         | olive ridley ( <i>Lepidochelys olivacea</i> )   | tissue                     | Ghana, West coast of Africa      | -                             |                                                                             | -                     |                                                                             | -                     |                                                                             |
| Lo-GhT-40         | olive ridley ( <i>Lepidochelys olivacea</i> )   | tissue                     | Ghana, West coast of Africa      | -                             |                                                                             | -                     |                                                                             | -                     |                                                                             |
| Lo-GhT-41         | olive ridley ( <i>Lepidochelys olivacea</i> )   | tissue                     | Ghana, West coast of Africa      | -                             |                                                                             | -                     |                                                                             | -                     |                                                                             |
| Lo-GhT-46         | olive ridley ( <i>Lepidochelys olivacea</i> )   | tissue                     | Ghana, West coast of Africa      | -                             |                                                                             | -                     |                                                                             | -                     |                                                                             |
| Lo-GhT-47         | olive ridley ( <i>Lepidochelys olivacea</i> )   | tissue                     | Ghana, West coast of Africa      | -                             |                                                                             | -                     |                                                                             | -                     |                                                                             |
| Lo-GhT-49         | olive ridley ( <i>Lepidochelys olivacea</i> )   | tissue                     | Ghana, West coast of Africa      | -                             |                                                                             | -                     |                                                                             | -                     |                                                                             |
| Cma-HaFP-10LFF    | green ( <i>Chelonia mydas/agassizi</i> )        | tumour left front flipper  | Hawaii, North Pacific            | +                             | R                                                                           | +                     | R                                                                           | +                     | R                                                                           |
| Cma-HaFP-10LHF    | green ( <i>Chelonia mydas/agassizi</i> )        | tumour left hind flipper   | Hawaii, North Pacific            | +                             | R                                                                           | +                     | R                                                                           | -                     |                                                                             |
| Cma-HaFP-10RFF    | green ( <i>Chelonia mydas/agassizi</i> )        | tumour right front flipper | Hawaii, North Pacific            | +                             | R                                                                           | +                     | R                                                                           | +                     | C                                                                           |
| Cma-HaFP-11LHF    | green ( <i>Chelonia mydas/agassizi</i> )        | tumour left hind flipper   | Hawaii, North Pacific            | -                             |                                                                             | +                     | R                                                                           | +                     | F                                                                           |
| Cma-HaFP-11neck   | green ( <i>Chelonia mydas/agassizi</i> )        | tumour neck                | Hawaii, North Pacific            | +                             | R                                                                           | +                     | R                                                                           | -                     |                                                                             |
| Cma-HaFP-11RHF    | green ( <i>Chelonia mydas/agassizi</i> )        | tumour right hind flipper  | Hawaii, North Pacific            | +                             | R                                                                           | +                     | R                                                                           | -                     |                                                                             |
| Cma-HaFP-12LFF    | green ( <i>Chelonia mydas/agassizi</i> )        | tumour left front flipper  | Hawaii, North Pacific            | +                             | R                                                                           | +                     | R                                                                           | +                     | R                                                                           |
| Cma-HaFP-12LHF    | green ( <i>Chelonia mydas/agassizi</i> )        | tumour left hind flipper   | Hawaii, North Pacific            | +                             | R                                                                           | -                     |                                                                             | +                     | C                                                                           |
| Cma-HaFP-12tail   | green ( <i>Chelonia mydas/agassizi</i> )        | tumour tail                | Hawaii, North Pacific            | +                             | R                                                                           | +                     | R                                                                           | -                     |                                                                             |
| Cma-HaFP-14neck   | green ( <i>Chelonia mydas/agassizi</i> )        | tumour neck                | Hawaii, North Pacific            | -                             |                                                                             | +                     | R                                                                           | +                     | C                                                                           |
| Cma-HaFP-14RHF    | green ( <i>Chelonia mydas/agassizi</i> )        | tumour right hind flipper  | Hawaii, North Pacific            | +                             | R                                                                           | +                     | R                                                                           | +                     | F                                                                           |
| Cma-HaFP-14tail   | green ( <i>Chelonia mydas/agassizi</i> )        | tumour tail                | Hawaii, North Pacific            | +                             | R                                                                           | +                     | R                                                                           | +                     | C                                                                           |
| Cma-HaFP-15neck   | green ( <i>Chelonia mydas/agassizi</i> )        | tumour neck                | Hawaii, North Pacific            | +                             | R                                                                           | +                     | R                                                                           | +                     | R                                                                           |
| Cma-HaFP-15Reye   | green ( <i>Chelonia mydas/agassizi</i> )        | tumour right eye           | Hawaii, North Pacific            | +                             | R                                                                           | +                     | R                                                                           | -                     |                                                                             |

| Sample Code        | Species                                  | Type of sample             | Sample origin site (population) | Viral detection by PCR assays |                                                                             |                       |                                                                             |                       |                                                                             |
|--------------------|------------------------------------------|----------------------------|---------------------------------|-------------------------------|-----------------------------------------------------------------------------|-----------------------|-----------------------------------------------------------------------------|-----------------------|-----------------------------------------------------------------------------|
|                    |                                          |                            |                                 | Singleplex primer set         | Confirmed DNA sequence (F= forward, R=reverse, C=consensus of both F and R) | Singleplex primer set | Confirmed DNA sequence (F= forward, R=reverse, C=consensus of both F and R) | Singleplex primer set | Confirmed DNA sequence (F= forward, R=reverse, C=consensus of both F and R) |
|                    |                                          |                            |                                 | UL18 (140bp)                  |                                                                             | UL22 (179bp)          |                                                                             | UL27 (143bp)          |                                                                             |
| Cma-HaFP-15RHF     | green ( <i>Chelonia mydas/agassizi</i> ) | tumour right hind flipper  | Hawaii, North Pacific           | -                             |                                                                             | +                     | R                                                                           | -                     |                                                                             |
| Cma-HaFP-1LHF      | green ( <i>Chelonia mydas/agassizi</i> ) | tumour left hind flipper   | Hawaii, North Pacific           | -                             |                                                                             | -                     |                                                                             | +                     | C                                                                           |
| Cma-HaFP-1Rmouth   | green ( <i>Chelonia mydas/agassizi</i> ) | tumour R mouth             | Hawaii, North Pacific           | +                             | R                                                                           | -                     |                                                                             | +                     | C                                                                           |
| Cma-HaFP-2LFF      | green ( <i>Chelonia mydas/agassizi</i> ) | tumour left front flipper  | Hawaii, North Pacific           | +                             | R                                                                           |                       |                                                                             | +                     | C                                                                           |
| Cma-HaFP-2LHF      | green ( <i>Chelonia mydas/agassizi</i> ) | tumour left hind flipper   | Hawaii, North Pacific           | +                             | R                                                                           |                       |                                                                             | +                     | C                                                                           |
| Cma-HaFP-3LHF      | green ( <i>Chelonia mydas/agassizi</i> ) | tumour left hind flipper   | Hawaii, North Pacific           | -                             |                                                                             | +                     | R                                                                           | +                     | C                                                                           |
| Cma-HaFP-3neck     | green ( <i>Chelonia mydas/agassizi</i> ) | tumour neck                | Hawaii, North Pacific           | +                             | R                                                                           | -                     |                                                                             | +                     | C                                                                           |
| Cma-HaFP-4neck     | green ( <i>Chelonia mydas/agassizi</i> ) | tumour neck                | Hawaii, North Pacific           | +                             | R                                                                           | -                     |                                                                             | -                     |                                                                             |
| Cma-HaFP-5LFF      | green ( <i>Chelonia mydas/agassizi</i> ) | tumour left front flipper  | Hawaii, North Pacific           | +                             | R                                                                           | +                     | R                                                                           | +                     | C                                                                           |
| Cma-HaFP-5RFF      | green ( <i>Chelonia mydas/agassizi</i> ) | tumour right front flipper | Hawaii, North Pacific           | -                             |                                                                             | -                     |                                                                             | +                     | C                                                                           |
| Cma-HaFP-6neck     | green ( <i>Chelonia mydas/agassizi</i> ) | tumour neck                | Hawaii, North Pacific           | +                             | R                                                                           | +                     | R                                                                           | -                     |                                                                             |
| Cma-HaFP-6neck1    | green ( <i>Chelonia mydas/agassizi</i> ) | tumour neck1               | Hawaii, North Pacific           | +                             | R                                                                           | +                     | R                                                                           | -                     |                                                                             |
| Cma-HaFP-6RFlipper | green ( <i>Chelonia mydas/agassizi</i> ) | tumour right flipper       | Hawaii, North Pacific           | +                             | R                                                                           | +                     | R                                                                           | -                     |                                                                             |
| Cma-HaFP-7Leye     | green ( <i>Chelonia mydas/agassizi</i> ) | tumour left eye            | Hawaii, North Pacific           | +                             | R                                                                           | +                     | R                                                                           | -                     |                                                                             |
| Cma-HaFP-7LHF      | green ( <i>Chelonia mydas/agassizi</i> ) | tumour left hind flipper   | Hawaii, North Pacific           | +                             | R                                                                           | +                     | R                                                                           | +                     | R                                                                           |
| Cma-HaFP-7Reye     | green ( <i>Chelonia mydas/agassizi</i> ) | tumour right eye           | Hawaii, North Pacific           | +                             | R                                                                           | +                     | R                                                                           | -                     |                                                                             |
| Cma-HaFP-8LFF      | green ( <i>Chelonia mydas/agassizi</i> ) | tumour left front flipper  | Hawaii, North Pacific           | +                             | B                                                                           | +                     | R                                                                           | -                     |                                                                             |
| Cma-HaFP-8maxilla  | green ( <i>Chelonia mydas/agassizi</i> ) | tumour maxilla             | Hawaii, North Pacific           | +                             | R                                                                           | +                     | R                                                                           | +                     | R                                                                           |
| Cma-HaFP-8RHF      | green ( <i>Chelonia mydas/agassizi</i> ) | tumour right hind flipper  | Hawaii, North Pacific           | +                             | R                                                                           | +                     | R                                                                           | +                     | R                                                                           |
| Cma-HaFP-9cloaca   | green ( <i>Chelonia mydas/agassizi</i> ) | tumour cloaca              | Hawaii, North Pacific           | -                             |                                                                             | +                     | R                                                                           | -                     |                                                                             |
| Cma-HaFP-9LFF      | green ( <i>Chelonia mydas/agassizi</i> ) | tumour left front flipper  | Hawaii, North Pacific           | +                             | R                                                                           | +                     | R                                                                           | -                     |                                                                             |
| Cma-HaFP-9RFF      | green ( <i>Chelonia mydas/agassizi</i> ) | tumour right front flipper | Hawaii, North Pacific           | +                             | R                                                                           | +                     | R                                                                           | +                     | F                                                                           |
| Cma-HaT-1          | green ( <i>Chelonia mydas/agassizi</i> ) | tissue                     | Hawaii, North Pacific           | -                             |                                                                             | -                     |                                                                             | -                     |                                                                             |
| Cma-HaT-10         | green ( <i>Chelonia mydas/agassizi</i> ) | tissue                     | Hawaii, North Pacific           | -                             |                                                                             | +                     | R                                                                           | +                     | R                                                                           |
| Cma-HaT-11         | green ( <i>Chelonia mydas/agassizi</i> ) | tissue                     | Hawaii, North Pacific           | +                             | R                                                                           | +                     | R                                                                           | +                     | C                                                                           |
| Cma-HaT-12         | green ( <i>Chelonia mydas/agassizi</i> ) | tissue                     | Hawaii, North Pacific           | -                             |                                                                             | -                     |                                                                             | +                     | F                                                                           |
| Cma-HaT-13         | green ( <i>Chelonia mydas/agassizi</i> ) | tissue                     | Hawaii, North Pacific           | -                             |                                                                             | +                     | R                                                                           | +                     | F                                                                           |
| Cma-HaT-14         | green ( <i>Chelonia mydas/agassizi</i> ) | tissue                     | Hawaii, North Pacific           | +                             | R                                                                           | +                     | R                                                                           | +                     | C                                                                           |
| Cma-HaT-15         | green ( <i>Chelonia mydas/agassizi</i> ) | tissue                     | Hawaii, North Pacific           | -                             |                                                                             | +                     | R                                                                           | -                     |                                                                             |
| Cma-HaT-2          | green ( <i>Chelonia mydas/agassizi</i> ) | tissue                     | Hawaii, North Pacific           | +                             | R                                                                           | -                     |                                                                             | +                     | C                                                                           |
| Cma-HaT-3          | green ( <i>Chelonia mydas/agassizi</i> ) | tissue                     | Hawaii, North Pacific           | -                             |                                                                             | -                     |                                                                             | +                     | C                                                                           |
| Cma-HaT-4          | green ( <i>Chelonia mydas/agassizi</i> ) | tissue                     | Hawaii, North Pacific           | -                             |                                                                             | -                     |                                                                             | +                     | C                                                                           |
| Cma-HaT-5          | green ( <i>Chelonia mydas/agassizi</i> ) | tissue                     | Hawaii, North Pacific           | -                             |                                                                             | -                     |                                                                             | +                     | C                                                                           |
| Cma-HaT-6          | green ( <i>Chelonia mydas/agassizi</i> ) | tissue                     | Hawaii, North Pacific           | -                             |                                                                             | +                     | R                                                                           | +                     | C                                                                           |
| Cma-HaT-7          | green ( <i>Chelonia mydas/agassizi</i> ) | tissue                     | Hawaii, North Pacific           | -                             |                                                                             | +                     | R                                                                           | -                     |                                                                             |
| Cma-HaT-8          | green ( <i>Chelonia mydas/agassizi</i> ) | tissue                     | Hawaii, North Pacific           | +                             | B                                                                           | +                     | R                                                                           | +                     | C                                                                           |
| Cma-HaT-9          | green ( <i>Chelonia mydas/agassizi</i> ) | tissue                     | Hawaii, North Pacific           | -                             |                                                                             | +                     | R                                                                           | -                     |                                                                             |
| Cc-MaT-01          | loggerhead ( <i>Caretta caretta</i> )    | tissue                     | Masirah, Oman                   | -                             |                                                                             | -                     |                                                                             | -                     |                                                                             |
| Cc-MaT-02          | loggerhead ( <i>Caretta caretta</i> )    | tissue                     | Masirah, Oman                   | -                             |                                                                             | -                     |                                                                             | -                     |                                                                             |
| Cc-MaT-03          | loggerhead ( <i>Caretta caretta</i> )    | tissue                     | Masirah, Oman                   | -                             |                                                                             | -                     |                                                                             | -                     |                                                                             |
| Cc-MaT-04          | loggerhead ( <i>Caretta caretta</i> )    | tissue                     | Masirah, Oman                   | -                             |                                                                             | -                     |                                                                             | -                     |                                                                             |
| Cc-MaT-05          | loggerhead ( <i>Caretta caretta</i> )    | tissue                     | Masirah, Oman                   | -                             |                                                                             | -                     |                                                                             | -                     |                                                                             |
| Cc-MaT-06          | loggerhead ( <i>Caretta caretta</i> )    | tissue                     | Masirah, Oman                   | -                             |                                                                             | -                     |                                                                             | -                     |                                                                             |
| Cc-MaT-07          | loggerhead ( <i>Caretta caretta</i> )    | tissue                     | Masirah, Oman                   | -                             |                                                                             | -                     |                                                                             | -                     |                                                                             |
| Cc-MaT-07ab        | loggerhead ( <i>Caretta caretta</i> )    | abnormal tissue            | Masirah, Oman                   | -                             |                                                                             | -                     |                                                                             | -                     |                                                                             |
| Cc-MaT-08          | loggerhead ( <i>Caretta caretta</i> )    | tissue                     | Masirah, Oman                   | -                             |                                                                             | -                     |                                                                             | -                     |                                                                             |
| Cc-MaT-08ab        | loggerhead ( <i>Caretta caretta</i> )    | abnormal tissue            | Masirah, Oman                   | -                             |                                                                             | -                     |                                                                             | -                     |                                                                             |
| Cc-MaT-09          | loggerhead ( <i>Caretta caretta</i> )    | tissue                     | Masirah, Oman                   | -                             |                                                                             | -                     |                                                                             | -                     |                                                                             |
| Cc-MaT-10          | loggerhead ( <i>Caretta caretta</i> )    | tissue                     | Masirah, Oman                   | -                             |                                                                             | -                     |                                                                             | -                     |                                                                             |
| Cc-MaT-11          | loggerhead ( <i>Caretta caretta</i> )    | tissue                     | Masirah, Oman                   | -                             |                                                                             | -                     |                                                                             | -                     |                                                                             |
| Cc-MaT-12          | loggerhead ( <i>Caretta caretta</i> )    | tissue                     | Masirah, Oman                   | -                             |                                                                             | -                     |                                                                             | -                     |                                                                             |
| Cc-MaT-13          | loggerhead ( <i>Caretta caretta</i> )    | tissue                     | Masirah, Oman                   | -                             |                                                                             | -                     |                                                                             | -                     |                                                                             |
| Cc-MaT-14          | loggerhead ( <i>Caretta caretta</i> )    | tissue                     | Masirah, Oman                   | -                             |                                                                             | -                     |                                                                             | -                     |                                                                             |
| Cc-MaT-14ab        | loggerhead ( <i>Caretta caretta</i> )    | abnormal tissue            | Masirah, Oman                   | -                             |                                                                             | -                     |                                                                             | -                     |                                                                             |
| Cc-MaT-15          | loggerhead ( <i>Caretta caretta</i> )    | tissue                     | Masirah, Oman                   | -                             |                                                                             | -                     |                                                                             | -                     |                                                                             |
| Cc-MaT-16          | loggerhead ( <i>Caretta caretta</i> )    | tissue                     | Masirah, Oman                   | -                             |                                                                             | -                     |                                                                             | -                     |                                                                             |
| Cc-MaT-17          | loggerhead ( <i>Caretta caretta</i> )    | tissue                     | Masirah, Oman                   | -                             |                                                                             | -                     |                                                                             | -                     |                                                                             |
| Cc-MaT-18          | loggerhead ( <i>Caretta caretta</i> )    | tissue                     | Masirah, Oman                   | -                             |                                                                             | -                     |                                                                             | -                     |                                                                             |
| Cc-MaT-19          | loggerhead ( <i>Caretta caretta</i> )    | tissue                     | Masirah, Oman                   | -                             |                                                                             | -                     |                                                                             | -                     |                                                                             |
| Cc-MaT-20k15       | loggerhead ( <i>Caretta caretta</i> )    | tissue                     | Masirah, Oman                   | -                             |                                                                             | -                     |                                                                             | -                     |                                                                             |
| Cc-MaT-20k15ab     | loggerhead ( <i>Caretta caretta</i> )    | abnormal tissue            | Masirah, Oman                   | -                             |                                                                             | -                     |                                                                             | -                     |                                                                             |
| Cc-MaT-20k9        | loggerhead ( <i>Caretta caretta</i> )    | tissue                     | Masirah, Oman                   | -                             |                                                                             | -                     |                                                                             | -                     |                                                                             |
| Cc-MaT-21          | loggerhead ( <i>Caretta caretta</i> )    | tissue                     | Masirah, Oman                   | -                             |                                                                             | -                     |                                                                             | -                     |                                                                             |
| Cc-MaT-21ab        | loggerhead ( <i>Caretta caretta</i> )    | abnormal tissue            | Masirah, Oman                   | -                             |                                                                             | -                     |                                                                             | -                     |                                                                             |
| Cc-MaT-22          | loggerhead ( <i>Caretta caretta</i> )    | tissue                     | Masirah, Oman                   | -                             |                                                                             | -                     |                                                                             | -                     |                                                                             |
| Cc-MaT-23          | loggerhead ( <i>Caretta caretta</i> )    | tissue                     | Masirah, Oman                   | -                             |                                                                             | -                     |                                                                             | -                     |                                                                             |
| Cc-MaT-25          | loggerhead ( <i>Caretta caretta</i> )    | tissue                     | Masirah, Oman                   | -                             |                                                                             | -                     |                                                                             | -                     |                                                                             |
| Cc-MaT-26          | loggerhead ( <i>Caretta caretta</i> )    | tissue                     | Masirah, Oman                   | -                             |                                                                             | -                     |                                                                             | -                     |                                                                             |
| Cc-MaT-27          | loggerhead ( <i>Caretta caretta</i> )    | tissue                     | Masirah, Oman                   | -                             |                                                                             | -                     |                                                                             | -                     |                                                                             |
| Cc-MaT-28          | loggerhead ( <i>Caretta caretta</i> )    | tissue                     | Masirah, Oman                   | -                             |                                                                             | -                     |                                                                             | -                     |                                                                             |
| Cc-MaT-29          | loggerhead ( <i>Caretta caretta</i> )    | tissue                     | Masirah, Oman                   | -                             |                                                                             | -                     |                                                                             | -                     |                                                                             |
| Cc-MaT-30          | loggerhead ( <i>Caretta caretta</i> )    | tissue                     | Masirah, Oman                   | -                             |                                                                             | -                     |                                                                             | -                     |                                                                             |

| Sample Code | Species                                       | Type of sample                       | Sample origin site (population)       | Viral detection by PCR assays |                                                                             |                       |                                                                             |                       |                                                                             |
|-------------|-----------------------------------------------|--------------------------------------|---------------------------------------|-------------------------------|-----------------------------------------------------------------------------|-----------------------|-----------------------------------------------------------------------------|-----------------------|-----------------------------------------------------------------------------|
|             |                                               |                                      |                                       | Singleplex primer set         | Confirmed DNA sequence (F= forward, R=reverse, C=consensus of both F and R) | Singleplex primer set | Confirmed DNA sequence (F= forward, R=reverse, C=consensus of both F and R) | Singleplex primer set | Confirmed DNA sequence (F= forward, R=reverse, C=consensus of both F and R) |
|             |                                               |                                      |                                       | UL18 (140bp)                  |                                                                             | UL22 (179bp)          |                                                                             | UL27 (143bp)          |                                                                             |
| Cc-MaT-31   | loggerhead ( <i>Caretta caretta</i> )         | tissue                               | Masirah, Oman                         | -                             |                                                                             | -                     |                                                                             | -                     |                                                                             |
| Cc-MaT-32   | loggerhead ( <i>Caretta caretta</i> )         | tissue                               | Masirah, Oman                         | -                             |                                                                             | -                     |                                                                             | -                     |                                                                             |
| Lo-MaT-01   | olive ridley ( <i>Lepidochelys olivacea</i> ) | tissue                               | Masirah, Oman                         | -                             |                                                                             | -                     |                                                                             | -                     |                                                                             |
| Cc-CyT-012  | loggerhead ( <i>Caretta caretta</i> )         | tissue                               | Northern Cyprus, Mediterranean Sea    | -                             |                                                                             | -                     |                                                                             | +                     | C                                                                           |
| Cc-CyT-111  | loggerhead ( <i>Caretta caretta</i> )         | tissue                               | Northern Cyprus, Mediterranean Sea    | -                             |                                                                             | -                     |                                                                             | -                     |                                                                             |
| Cc-CyT-192  | loggerhead ( <i>Caretta caretta</i> )         | tissue                               | Northern Cyprus, Mediterranean Sea    | -                             |                                                                             | -                     |                                                                             | -                     |                                                                             |
| Cc-CyT-240  | loggerhead ( <i>Caretta caretta</i> )         | tissue                               | Northern Cyprus, Mediterranean Sea    | -                             |                                                                             | -                     |                                                                             | -                     |                                                                             |
| Cc-CyT-255  | loggerhead ( <i>Caretta caretta</i> )         | tissue                               | Northern Cyprus, Mediterranean Sea    | -                             |                                                                             | -                     |                                                                             | -                     |                                                                             |
| Cc-CyT-275  | loggerhead ( <i>Caretta caretta</i> )         | tissue                               | Northern Cyprus, Mediterranean Sea    | -                             |                                                                             | -                     |                                                                             | +                     | C                                                                           |
| Cc-CyT-276  | loggerhead ( <i>Caretta caretta</i> )         | tissue                               | Northern Cyprus, Mediterranean Sea    | -                             |                                                                             | -                     |                                                                             | -                     |                                                                             |
| Cc-CyT-281  | loggerhead ( <i>Caretta caretta</i> )         | tissue                               | Northern Cyprus, Mediterranean Sea    | -                             |                                                                             | +                     | R                                                                           | -                     |                                                                             |
| Cc-CyT-288  | loggerhead ( <i>Caretta caretta</i> )         | tissue                               | Northern Cyprus, Mediterranean Sea    | -                             |                                                                             | +                     | R                                                                           | -                     |                                                                             |
| Cc-CyT-327  | loggerhead ( <i>Caretta caretta</i> )         | tissue                               | Northern Cyprus, Mediterranean Sea    | -                             |                                                                             | -                     |                                                                             | -                     |                                                                             |
| Cc-CyT-329  | loggerhead ( <i>Caretta caretta</i> )         | tissue                               | Northern Cyprus, Mediterranean Sea    | -                             |                                                                             | -                     |                                                                             | -                     |                                                                             |
| Cc-CyT-331  | loggerhead ( <i>Caretta caretta</i> )         | tissue                               | Northern Cyprus, Mediterranean Sea    | -                             |                                                                             | -                     |                                                                             | -                     |                                                                             |
| Cc-CyT-334  | loggerhead ( <i>Caretta caretta</i> )         | tissue                               | Northern Cyprus, Mediterranean Sea    | -                             |                                                                             | -                     |                                                                             | -                     |                                                                             |
| Cc-CyT-335  | loggerhead ( <i>Caretta caretta</i> )         | tissue                               | Northern Cyprus, Mediterranean Sea    | -                             |                                                                             | -                     |                                                                             | -                     |                                                                             |
| Cc-CyT-336  | loggerhead ( <i>Caretta caretta</i> )         | tissue                               | Northern Cyprus, Mediterranean Sea    | -                             |                                                                             | -                     |                                                                             | -                     |                                                                             |
| Cc-CyT-338  | loggerhead ( <i>Caretta caretta</i> )         | tissue                               | Northern Cyprus, Mediterranean Sea    | -                             |                                                                             | -                     |                                                                             | -                     |                                                                             |
| Cc-CyT-339  | loggerhead ( <i>Caretta caretta</i> )         | tissue                               | Northern Cyprus, Mediterranean Sea    | -                             |                                                                             | -                     |                                                                             | -                     |                                                                             |
| Cc-CyT-340  | loggerhead ( <i>Caretta caretta</i> )         | tissue                               | Northern Cyprus, Mediterranean Sea    | -                             |                                                                             | -                     |                                                                             | -                     |                                                                             |
| Cc-CyT-341  | loggerhead ( <i>Caretta caretta</i> )         | tissue                               | Northern Cyprus, Mediterranean Sea    | -                             |                                                                             | -                     |                                                                             | -                     |                                                                             |
| Cc-CyT-342  | loggerhead ( <i>Caretta caretta</i> )         | tissue                               | Northern Cyprus, Mediterranean Sea    | -                             |                                                                             | -                     |                                                                             | -                     |                                                                             |
| Cc-CyT-343  | loggerhead ( <i>Caretta caretta</i> )         | tissue                               | Northern Cyprus, Mediterranean Sea    | -                             |                                                                             | -                     |                                                                             | -                     |                                                                             |
| Cc-CyT-345  | loggerhead ( <i>Caretta caretta</i> )         | tissue                               | Northern Cyprus, Mediterranean Sea    | -                             |                                                                             | -                     |                                                                             | -                     |                                                                             |
| Cc-CyT-346  | loggerhead ( <i>Caretta caretta</i> )         | tissue                               | Northern Cyprus, Mediterranean Sea    | -                             |                                                                             | +                     | R                                                                           | -                     |                                                                             |
| Cc-CyT-349  | loggerhead ( <i>Caretta caretta</i> )         | tissue                               | Northern Cyprus, Mediterranean Sea    | -                             |                                                                             | -                     |                                                                             | -                     |                                                                             |
| Cm-CyT-015  | green ( <i>Chelonia mydas</i> )               | tissue                               | Northern Cyprus, Mediterranean Sea    | -                             |                                                                             | -                     |                                                                             | +                     | F                                                                           |
| Cm-CyT-070  | green ( <i>Chelonia mydas</i> )               | tissue                               | Northern Cyprus, Mediterranean Sea    | -                             |                                                                             | -                     |                                                                             | +                     | F                                                                           |
| Cm-CyT-071  | green ( <i>Chelonia mydas</i> )               | tissue                               | Northern Cyprus, Mediterranean Sea    | -                             |                                                                             | -                     |                                                                             | -                     |                                                                             |
| Cm-CyT-156  | green ( <i>Chelonia mydas</i> )               | tissue                               | Northern Cyprus, Mediterranean Sea    | -                             |                                                                             | +                     | R                                                                           | -                     |                                                                             |
| Cm-CyT-157  | green ( <i>Chelonia mydas</i> )               | tissue                               | Northern Cyprus, Mediterranean Sea    | -                             |                                                                             | -                     |                                                                             | -                     |                                                                             |
| Cm-CyT-166  | green ( <i>Chelonia mydas</i> )               | tissue                               | Northern Cyprus, Mediterranean Sea    | -                             |                                                                             | -                     |                                                                             | -                     |                                                                             |
| Cm-CyT-183  | green ( <i>Chelonia mydas</i> )               | tissue                               | Northern Cyprus, Mediterranean Sea    | -                             |                                                                             | -                     |                                                                             | -                     |                                                                             |
| Cm-CyT-185  | green ( <i>Chelonia mydas</i> )               | tissue                               | Northern Cyprus, Mediterranean Sea    | -                             |                                                                             | -                     |                                                                             | -                     |                                                                             |
| Cm-CyT-191  | green ( <i>Chelonia mydas</i> )               | tissue                               | Northern Cyprus, Mediterranean Sea    | -                             |                                                                             | -                     |                                                                             | -                     |                                                                             |
| Cm-CyT-205  | green ( <i>Chelonia mydas</i> )               | tissue                               | Northern Cyprus, Mediterranean Sea    | -                             |                                                                             | -                     |                                                                             | -                     |                                                                             |
| Cm-CyT-206  | green ( <i>Chelonia mydas</i> )               | tissue                               | Northern Cyprus, Mediterranean Sea    | -                             |                                                                             | -                     |                                                                             | -                     |                                                                             |
| Cm-CyT-208  | green ( <i>Chelonia mydas</i> )               | tissue                               | Northern Cyprus, Mediterranean Sea    | -                             |                                                                             | -                     |                                                                             | -                     |                                                                             |
| Cm-CyT-209  | green ( <i>Chelonia mydas</i> )               | tissue                               | Northern Cyprus, Mediterranean Sea    | -                             |                                                                             | -                     |                                                                             | -                     |                                                                             |
| Cm-CyT-210  | green ( <i>Chelonia mydas</i> )               | tissue                               | Northern Cyprus, Mediterranean Sea    | -                             |                                                                             | -                     |                                                                             | -                     |                                                                             |
| Cm-CyT-211  | green ( <i>Chelonia mydas</i> )               | tissue                               | Northern Cyprus, Mediterranean Sea    | -                             |                                                                             | -                     |                                                                             | -                     |                                                                             |
| Cm-CyT-212  | green ( <i>Chelonia mydas</i> )               | tissue                               | Northern Cyprus, Mediterranean Sea    | -                             |                                                                             | -                     |                                                                             | -                     |                                                                             |
| Cm-CyT-213  | green ( <i>Chelonia mydas</i> )               | tissue                               | Northern Cyprus, Mediterranean Sea    | -                             |                                                                             | -                     |                                                                             | -                     |                                                                             |
| Cm-CyT-214  | green ( <i>Chelonia mydas</i> )               | tissue                               | Northern Cyprus, Mediterranean Sea    | -                             |                                                                             | -                     |                                                                             | -                     |                                                                             |
| Cm-CyT-216  | green ( <i>Chelonia mydas</i> )               | tissue                               | Northern Cyprus, Mediterranean Sea    | -                             |                                                                             | -                     |                                                                             | -                     |                                                                             |
| Cm-CyT-218  | green ( <i>Chelonia mydas</i> )               | tissue                               | Northern Cyprus, Mediterranean Sea    | -                             |                                                                             | -                     |                                                                             | -                     |                                                                             |
| Cm-CyT-221  | green ( <i>Chelonia mydas</i> )               | tissue                               | Northern Cyprus, Mediterranean Sea    | -                             |                                                                             | -                     |                                                                             | -                     |                                                                             |
| Cm-CyT-222  | green ( <i>Chelonia mydas</i> )               | tissue                               | Northern Cyprus, Mediterranean Sea    | -                             |                                                                             | -                     |                                                                             | -                     |                                                                             |
| Cm-CyT-223  | green ( <i>Chelonia mydas</i> )               | tissue                               | Northern Cyprus, Mediterranean Sea    | -                             |                                                                             | -                     |                                                                             | -                     |                                                                             |
| Cm-CyT-225  | green ( <i>Chelonia mydas</i> )               | tissue                               | Northern Cyprus, Mediterranean Sea    | -                             |                                                                             | -                     |                                                                             | -                     |                                                                             |
| Cm-CyT-226  | green ( <i>Chelonia mydas</i> )               | tissue                               | Northern Cyprus, Mediterranean Sea    | -                             |                                                                             | +                     | R                                                                           | -                     |                                                                             |
| Cm-CyT-228  | green ( <i>Chelonia mydas</i> )               | tissue                               | Northern Cyprus, Mediterranean Sea    | -                             |                                                                             | +                     | R                                                                           | -                     |                                                                             |
| Cc-CaT-01   | loggerhead ( <i>Caretta caretta</i> )         | DNA-assumed taken from normal tissue | Noth Pacific, California              | -                             |                                                                             | -                     |                                                                             | -                     |                                                                             |
| Dc-OsT-01   | leatherback ( <i>Dermochelys coriacea</i> )   | tissue rear flipper                  | Ostional, Pacific of Costa Rica       | +                             | C                                                                           | -                     |                                                                             | +                     | C                                                                           |
| Lo-OsT-01   | olive ridley ( <i>Lepidochelys olivacea</i> ) | tissue rear flipper                  | Ostional, Pacific of Costa Rica       | -                             |                                                                             | -                     |                                                                             | +                     | C                                                                           |
| Lo-OsT-02   | olive ridley ( <i>Lepidochelys olivacea</i> ) | tissue rear flipper                  | Ostional, Pacific of Costa Rica       | -                             |                                                                             | -                     |                                                                             | -                     |                                                                             |
| Lo-OsT-03   | olive ridley ( <i>Lepidochelys olivacea</i> ) | tissue rear flipper                  | Ostional, Pacific of Costa Rica       | -                             |                                                                             | -                     |                                                                             | -                     |                                                                             |
| Lo-OsT-04   | olive ridley ( <i>Lepidochelys olivacea</i> ) | tissue rear flipper                  | Ostional, Pacific of Costa Rica       | -                             |                                                                             | -                     |                                                                             | -                     |                                                                             |
| Lo-OsT-05   | olive ridley ( <i>Lepidochelys olivacea</i> ) | tissue rear flipper                  | Ostional, Pacific of Costa Rica       | -                             |                                                                             | -                     |                                                                             | -                     |                                                                             |
| Lo-OsT-06   | olive ridley ( <i>Lepidochelys olivacea</i> ) | tissue rear flipper                  | Ostional, Pacific of Costa Rica       | -                             |                                                                             | -                     |                                                                             | -                     |                                                                             |
| Lo-OsT-07   | olive ridley ( <i>Lepidochelys olivacea</i> ) | tissue rear flipper                  | Ostional, Pacific of Costa Rica       | -                             |                                                                             | +                     | R                                                                           | -                     |                                                                             |
| Lo-OsT-08   | olive ridley ( <i>Lepidochelys olivacea</i> ) | tissue rear flipper                  | Ostional, Pacific of Costa Rica       | -                             |                                                                             | -                     |                                                                             | -                     |                                                                             |
| Lo-OsT-09   | olive ridley ( <i>Lepidochelys olivacea</i> ) | tissue rear flipper                  | Ostional, Pacific of Costa Rica       | -                             |                                                                             | -                     |                                                                             | -                     |                                                                             |
| Dc-PoT-1A   | leatherback ( <i>Dermochelys coriacea</i> )   | tissue                               | Portugal, North Atlantic              | -                             |                                                                             | -                     |                                                                             | +                     | C                                                                           |
| Dc-PoT-1B   | leatherback ( <i>Dermochelys coriacea</i> )   | tissue                               | Portugal, North Atlantic              | -                             |                                                                             | -                     |                                                                             | -                     |                                                                             |
| Cc-PoT-01   | loggerhead ( <i>Caretta caretta</i> )         | tissue and fat                       | Portugal, Zoomarine                   | -                             |                                                                             | -                     |                                                                             | +                     | C                                                                           |
| Cm-PoT-01   | green ( <i>Chelonia mydas</i> )               | tissue and fat                       | Portugal, Zoomarine                   | +                             | C                                                                           | -                     |                                                                             | +                     | C                                                                           |
| Cm-PoT-02   | green ( <i>Chelonia mydas</i> )               | tissue and fat                       | Portugal, Zoomarine                   | -                             |                                                                             | +                     | R                                                                           | -                     |                                                                             |
| Cm-PIFP-04  | green ( <i>Chelonia mydas</i> )               | tumour FP                            | Principe Island, West coast of Africa | +                             | R                                                                           | +                     | R                                                                           | +                     | C                                                                           |
| Cm-PIFP-20  | green ( <i>Chelonia mydas</i> )               | tumour FP                            | Principe Island, West coast of Africa | -                             |                                                                             | +                     | R                                                                           | +                     | C                                                                           |
| Cm-PIFP-51  | green ( <i>Chelonia mydas</i> )               | tumour FP                            | Principe Island, West coast of Africa | +                             | R                                                                           | +                     | R                                                                           | +                     | F                                                                           |

| Sample Code   | Species                                    | Type of sample                       | Sample origin site (population)       | Viral detection by PCR assays |                                                                             |                       |                                                                             |                       |                                                                             |
|---------------|--------------------------------------------|--------------------------------------|---------------------------------------|-------------------------------|-----------------------------------------------------------------------------|-----------------------|-----------------------------------------------------------------------------|-----------------------|-----------------------------------------------------------------------------|
|               |                                            |                                      |                                       | Singleplex primer set         | Confirmed DNA sequence (F= forward, R=reverse, C=consensus of both F and R) | Singleplex primer set | Confirmed DNA sequence (F= forward, R=reverse, C=consensus of both F and R) | Singleplex primer set | Confirmed DNA sequence (F= forward, R=reverse, C=consensus of both F and R) |
|               |                                            |                                      |                                       | UL18 (140bp)                  |                                                                             | UL22 (179bp)          |                                                                             | UL27 (143bp)          |                                                                             |
| Cm-PiFP-80    | green ( <i>Chelonia mydas</i> )            | tumour FP                            | Principe Island, West coast of Africa | +                             | C                                                                           | -                     |                                                                             | +                     | C                                                                           |
| Cm-PiFP-82    | green ( <i>Chelonia mydas</i> )            | tumour FP                            | Principe Island, West coast of Africa | -                             |                                                                             | +                     | R                                                                           | +                     | R                                                                           |
| Cm-PiFP-86    | green ( <i>Chelonia mydas</i> )            | tumour FP                            | Principe Island, West coast of Africa | +                             | R                                                                           | +                     | R                                                                           | -                     |                                                                             |
| Cm-PiFP-92    | green ( <i>Chelonia mydas</i> )            | tumour FP                            | Principe Island, West coast of Africa | +                             | R                                                                           | +                     | R                                                                           | +                     | R                                                                           |
| Cm-PIT-04     | green ( <i>Chelonia mydas</i> )            | tissue                               | Principe Island, West coast of Africa | -                             |                                                                             | -                     |                                                                             | +                     | F                                                                           |
| Cm-PIT-20     | green ( <i>Chelonia mydas</i> )            | tissue                               | Principe Island, West coast of Africa | +                             | R                                                                           | +                     | R                                                                           | -                     |                                                                             |
| Cm-PIT-51     | green ( <i>Chelonia mydas</i> )            | tissue                               | Principe Island, West coast of Africa | +                             | R                                                                           | +                     | R                                                                           | +                     | C                                                                           |
| Cm-PIT-80     | green ( <i>Chelonia mydas</i> )            | tissue                               | Principe Island, West coast of Africa | -                             |                                                                             | -                     |                                                                             | +                     | C                                                                           |
| Cm-PIT-82     | green ( <i>Chelonia mydas</i> )            | tissue                               | Principe Island, West coast of Africa | -                             |                                                                             | +                     | R                                                                           | -                     |                                                                             |
| Cm-PIT-86     | green ( <i>Chelonia mydas</i> )            | tissue                               | Principe Island, West coast of Africa | -                             |                                                                             | +                     | R                                                                           | -                     |                                                                             |
| Cm-PIT-92     | green ( <i>Chelonia mydas</i> )            | tissue                               | Principe Island, West coast of Africa | -                             |                                                                             | -                     |                                                                             | +                     | C                                                                           |
| Ei-PIT-25     | hawkbill ( <i>Eretmochelys imbricata</i> ) | tissue ID 380                        | Principe Island, West coast of Africa | -                             |                                                                             | -                     |                                                                             | +                     | C                                                                           |
| Ei-PIT-46     | hawkbill ( <i>Eretmochelys imbricata</i> ) | tissue                               | Principe Island, West coast of Africa | +                             | R                                                                           | +                     | R                                                                           | +                     | R                                                                           |
| Ei-PIT-71     | hawkbill ( <i>Eretmochelys imbricata</i> ) | tissue ID 430                        | Principe Island, West coast of Africa | +                             | R                                                                           | +                     | R                                                                           | +                     | C                                                                           |
| Ei-PIT-85     | hawkbill ( <i>Eretmochelys imbricata</i> ) | tissue ID 200                        | Principe Island, West coast of Africa | +                             | C                                                                           | -                     |                                                                             | +                     | C                                                                           |
| Cm-PRT-01     | green ( <i>Chelonia mydas</i> )            | tissue                               | Puerto Rico, Caribbean                | -                             |                                                                             | -                     |                                                                             | -                     |                                                                             |
| Cm-PRT-02     | green ( <i>Chelonia mydas</i> )            | tissue                               | Puerto Rico, Caribbean                | -                             |                                                                             | -                     |                                                                             | -                     |                                                                             |
| Cm-PRT-03     | green ( <i>Chelonia mydas</i> )            | tissue                               | Puerto Rico, Caribbean                | -                             |                                                                             | -                     |                                                                             | -                     |                                                                             |
| Cm-PRT-04     | green ( <i>Chelonia mydas</i> )            | tissue                               | Puerto Rico, Caribbean                | -                             |                                                                             | +                     | R                                                                           | -                     |                                                                             |
| Cm-PRT-05     | green ( <i>Chelonia mydas</i> )            | tissue                               | Puerto Rico, Caribbean                | -                             |                                                                             | -                     |                                                                             | -                     |                                                                             |
| Cm-PRT-06     | green ( <i>Chelonia mydas</i> )            | tissue                               | Puerto Rico, Caribbean                | -                             |                                                                             | +                     | R                                                                           | -                     |                                                                             |
| Ei-PRT-01     | hawkbill ( <i>Eretmochelys imbricata</i> ) | tissue                               | Puerto Rico, Caribbean                | -                             |                                                                             | -                     |                                                                             | -                     |                                                                             |
| Ei-PRT-02     | hawkbill ( <i>Eretmochelys imbricata</i> ) | tissue                               | Puerto Rico, Caribbean                | -                             |                                                                             | -                     |                                                                             | -                     |                                                                             |
| Ei-PRT-03     | hawkbill ( <i>Eretmochelys imbricata</i> ) | tissue                               | Puerto Rico, Caribbean                | -                             |                                                                             | -                     |                                                                             | -                     |                                                                             |
| Ei-PRT-04     | hawkbill ( <i>Eretmochelys imbricata</i> ) | tissue                               | Puerto Rico, Caribbean                | -                             |                                                                             | -                     |                                                                             | -                     |                                                                             |
| Ei-PRT-05     | hawkbill ( <i>Eretmochelys imbricata</i> ) | tissue                               | Puerto Rico, Caribbean                | -                             |                                                                             | -                     |                                                                             | -                     |                                                                             |
| Cm-KuB-04     | green ( <i>Chelonia mydas</i> )            | blood                                | Qaru Island, Kuwait                   | -                             |                                                                             | -                     |                                                                             | -                     |                                                                             |
| Cm-KuT-01     | green ( <i>Chelonia mydas</i> )            | tissue front flipper                 | Qaru Island, Kuwait                   | -                             |                                                                             | -                     |                                                                             | -                     |                                                                             |
| Cm-KuT-02     | green ( <i>Chelonia mydas</i> )            | tissue front flipper                 | Qaru Island, Kuwait                   | -                             |                                                                             | -                     |                                                                             | -                     |                                                                             |
| Cm-KuT-03     | green ( <i>Chelonia mydas</i> )            | tissue front flipper                 | Qaru Island, Kuwait                   | -                             |                                                                             | -                     |                                                                             | -                     |                                                                             |
| Cm-KuT-04 (5) | green ( <i>Chelonia mydas</i> )            | tissue front flipper                 | Qaru Island, Kuwait                   | -                             |                                                                             | -                     |                                                                             | -                     |                                                                             |
| Cm-KuT-05     | green ( <i>Chelonia mydas</i> )            | tissue front flipper                 | Qaru Island, Kuwait                   | -                             |                                                                             | -                     |                                                                             | -                     |                                                                             |
| Cm-KuT-07     | green ( <i>Chelonia mydas</i> )            | tissue front flipper                 | Qaru Island, Kuwait                   | -                             |                                                                             | -                     |                                                                             | -                     |                                                                             |
| Cm-KuT-08 (6) | green ( <i>Chelonia mydas</i> )            | tissue front flipper                 | Qaru Island, Kuwait                   | -                             |                                                                             | -                     |                                                                             | -                     |                                                                             |
| Ei-KuT-10     | hawkbill ( <i>Eretmochelys imbricata</i> ) | tissue                               | Qaru Island, Kuwait                   | -                             |                                                                             | -                     |                                                                             | -                     |                                                                             |
| Ei-KuT-11     | hawkbill ( <i>Eretmochelys imbricata</i> ) | tissue                               | Qaru Island, Kuwait                   | -                             |                                                                             | -                     |                                                                             | -                     |                                                                             |
| Ei-KuT-12     | hawkbill ( <i>Eretmochelys imbricata</i> ) | tissue                               | Qaru Island, Kuwait                   | -                             |                                                                             | -                     |                                                                             | -                     |                                                                             |
| Ei-KuT-13     | hawkbill ( <i>Eretmochelys imbricata</i> ) | tissue                               | Qaru Island, Kuwait                   | -                             |                                                                             | -                     |                                                                             | -                     |                                                                             |
| Ei-KuT-14     | hawkbill ( <i>Eretmochelys imbricata</i> ) | tissue                               | Qaru Island, Kuwait                   | -                             |                                                                             | +                     | R                                                                           | -                     |                                                                             |
| Ei-KuT-15     | hawkbill ( <i>Eretmochelys imbricata</i> ) | tissue                               | Qaru Island, Kuwait                   | -                             |                                                                             | -                     |                                                                             | -                     |                                                                             |
| Ei-KuT-16     | hawkbill ( <i>Eretmochelys imbricata</i> ) | tissue                               | Qaru Island, Kuwait                   | -                             |                                                                             | +                     | R                                                                           | -                     |                                                                             |
| Ei-KuT-17     | hawkbill ( <i>Eretmochelys imbricata</i> ) | tissue                               | Qaru Island, Kuwait                   | -                             |                                                                             | -                     |                                                                             | -                     |                                                                             |
| Ei-KuT-18     | hawkbill ( <i>Eretmochelys imbricata</i> ) | tissue                               | Qaru Island, Kuwait                   | -                             |                                                                             | -                     |                                                                             | -                     |                                                                             |
| Ei-KuT-19     | hawkbill ( <i>Eretmochelys imbricata</i> ) | tissue                               | Qaru Island, Kuwait                   | +                             | R                                                                           | +                     | R                                                                           | -                     |                                                                             |
| Cma-SDT-01    | green ( <i>Chelonia mydas/agassizi</i> )   | DNA-assumed taken from normal tissue | San Diego Bay, California, Pacific    | -                             |                                                                             | -                     |                                                                             | +                     | C                                                                           |
| Cma-SDT-01a   | green ( <i>Chelonia mydas/agassizi</i> )   | DNA-assumed taken from normal tissue | San Diego Bay, California, Pacific    | -                             |                                                                             | -                     |                                                                             | -                     |                                                                             |
| Cma-SDT-02    | green ( <i>Chelonia mydas/agassizi</i> )   | DNA-assumed taken from normal tissue | San Diego Bay, California, Pacific    | -                             |                                                                             | -                     |                                                                             | +                     | C                                                                           |
| Cma-SDT-03    | green ( <i>Chelonia mydas/agassizi</i> )   | DNA-assumed taken from normal tissue | San Diego Bay, California, Pacific    | -                             |                                                                             | -                     |                                                                             | -                     |                                                                             |
| Cma-SDT-04    | green ( <i>Chelonia mydas/agassizi</i> )   | DNA-assumed taken from normal tissue | San Diego Bay, California, Pacific    | -                             |                                                                             | -                     |                                                                             | -                     |                                                                             |
| Cma-SDT-05    | green ( <i>Chelonia mydas/agassizi</i> )   | DNA-assumed taken from normal tissue | San Diego Bay, California, Pacific    | -                             |                                                                             | +                     | R                                                                           | -                     |                                                                             |
| Cma-SDT-06    | green ( <i>Chelonia mydas/agassizi</i> )   | DNA-assumed taken from normal tissue | San Diego Bay, California, Pacific    | -                             |                                                                             | +                     | R                                                                           | -                     |                                                                             |
| Cma-SDT-07    | green ( <i>Chelonia mydas/agassizi</i> )   | DNA-assumed taken from normal tissue | San Diego Bay, California, Pacific    | -                             |                                                                             | +                     | R                                                                           | -                     |                                                                             |
| Cma-SDT-08    | green ( <i>Chelonia mydas/agassizi</i> )   | DNA-assumed taken from normal tissue | San Diego Bay, California, Pacific    | -                             |                                                                             | +                     | R                                                                           | -                     |                                                                             |
| Cma-SDT-09    | green ( <i>Chelonia mydas/agassizi</i> )   | DNA-assumed taken from normal tissue | San Diego Bay, California, Pacific    | -                             |                                                                             | -                     |                                                                             | -                     |                                                                             |
| Cma-SDT-10    | green ( <i>Chelonia mydas/agassizi</i> )   | DNA-assumed taken from normal tissue | San Diego Bay, California, Pacific    | -                             |                                                                             | +                     | R                                                                           | -                     |                                                                             |
| Cma-SDT-11    | green ( <i>Chelonia mydas/agassizi</i> )   | DNA-assumed taken from normal tissue | San Diego Bay, California, Pacific    | -                             |                                                                             | +                     | R                                                                           | -                     |                                                                             |
| Cma-SDT-12    | green ( <i>Chelonia mydas/agassizi</i> )   | DNA-assumed taken from normal tissue | San Diego Bay, California, Pacific    | -                             |                                                                             | -                     |                                                                             | -                     |                                                                             |
| Cma-SDT-13    | green ( <i>Chelonia mydas/agassizi</i> )   | DNA-assumed taken from normal tissue | San Diego Bay, California, Pacific    | -                             |                                                                             | -                     |                                                                             | -                     |                                                                             |
| Cma-SDT-14    | green ( <i>Chelonia mydas/agassizi</i> )   | DNA-assumed taken from normal tissue | San Diego Bay, California, Pacific    | -                             |                                                                             | -                     |                                                                             | -                     |                                                                             |
| Cma-SDT-15    | green ( <i>Chelonia mydas/agassizi</i> )   | DNA-assumed taken from normal tissue | San Diego Bay, California, Pacific    | -                             |                                                                             | -                     |                                                                             | -                     |                                                                             |
| Cma-SDT-16    | green ( <i>Chelonia mydas/agassizi</i> )   | DNA-assumed taken from normal tissue | San Diego Bay, California, Pacific    | -                             |                                                                             | -                     |                                                                             | -                     |                                                                             |
| Cma-SDT-17    | green ( <i>Chelonia mydas/agassizi</i> )   | DNA-assumed taken from normal tissue | San Diego Bay, California, Pacific    | -                             |                                                                             | -                     |                                                                             | -                     |                                                                             |
| Cma-SDT-18    | green ( <i>Chelonia mydas/agassizi</i> )   | DNA-assumed taken from normal tissue | San Diego Bay, California, Pacific    | -                             |                                                                             | -                     |                                                                             | -                     |                                                                             |
| Cma-SDT-19    | green ( <i>Chelonia mydas/agassizi</i> )   | DNA-assumed taken from normal tissue | San Diego Bay, California, Pacific    | -                             |                                                                             | -                     |                                                                             | -                     |                                                                             |
| Cma-SDT-20    | green ( <i>Chelonia mydas/agassizi</i> )   | DNA-assumed taken from normal tissue | San Diego Bay, California, Pacific    | -                             |                                                                             | -                     |                                                                             | -                     |                                                                             |
| Cma-SDT-21    | green ( <i>Chelonia mydas/agassizi</i> )   | DNA-assumed taken from normal tissue | San Diego Bay, California, Pacific    | -                             |                                                                             | -                     |                                                                             | -                     |                                                                             |
| Cma-SDT-22    | green ( <i>Chelonia mydas/agassizi</i> )   | DNA-assumed taken from normal tissue | San Diego Bay, California, Pacific    | -                             |                                                                             | -                     |                                                                             | -                     |                                                                             |
| Cma-SDT-23    | green ( <i>Chelonia mydas/agassizi</i> )   | DNA-assumed taken from normal tissue | San Diego Bay, California, Pacific    | -                             |                                                                             | -                     |                                                                             | -                     |                                                                             |
| Cma-SDT-24    | green ( <i>Chelonia mydas/agassizi</i> )   | DNA-assumed taken from normal tissue | San Diego Bay, California, Pacific    | -                             |                                                                             | -                     |                                                                             | -                     |                                                                             |
| Cma-SDT-25    | green ( <i>Chelonia mydas/agassizi</i> )   | DNA-assumed taken from normal tissue | San Diego Bay, California, Pacific    | -                             |                                                                             | -                     |                                                                             | -                     |                                                                             |
| Cma-SDT-26    | green ( <i>Chelonia mydas/agassizi</i> )   | DNA-assumed taken from normal tissue | San Diego Bay, California, Pacific    | -                             |                                                                             | -                     |                                                                             | -                     |                                                                             |



| Sample Code         | Species                         | Type of sample               | Sample origin site (population)     | Viral detection by PCR assays |                                                                             |                       |                                                                             |                       |                                                                             |
|---------------------|---------------------------------|------------------------------|-------------------------------------|-------------------------------|-----------------------------------------------------------------------------|-----------------------|-----------------------------------------------------------------------------|-----------------------|-----------------------------------------------------------------------------|
|                     |                                 |                              |                                     | Singleplex primer set         | Confirmed DNA sequence (F= forward, R=reverse, C=consensus of both F and R) | Singleplex primer set | Confirmed DNA sequence (F= forward, R=reverse, C=consensus of both F and R) | Singleplex primer set | Confirmed DNA sequence (F= forward, R=reverse, C=consensus of both F and R) |
|                     |                                 |                              |                                     | UL18 (140bp)                  |                                                                             | UL22 (179bp)          |                                                                             | UL27 (143bp)          |                                                                             |
| Cm-ToT-13           | green ( <i>Chelonia mydas</i> ) | tissue rear flipper          | Tortuguero, Caribbean of Costa Rica | -                             |                                                                             | -                     |                                                                             | -                     |                                                                             |
| Cm-ToT-14           | green ( <i>Chelonia mydas</i> ) | tissue rear flipper          | Tortuguero, Caribbean of Costa Rica | -                             |                                                                             | -                     |                                                                             | -                     |                                                                             |
| Cm-ToT-15           | green ( <i>Chelonia mydas</i> ) | tissue rear flipper          | Tortuguero, Caribbean of Costa Rica | -                             |                                                                             | -                     |                                                                             | -                     |                                                                             |
| Cm-ToT-16           | green ( <i>Chelonia mydas</i> ) | tissue rear flipper          | Tortuguero, Caribbean of Costa Rica | -                             |                                                                             | -                     |                                                                             | -                     |                                                                             |
| Cm-ToT-17           | green ( <i>Chelonia mydas</i> ) | tissue rear flipper          | Tortuguero, Caribbean of Costa Rica | -                             |                                                                             | -                     |                                                                             | -                     |                                                                             |
| Cm-ToT-18           | green ( <i>Chelonia mydas</i> ) | tissue rear flipper          | Tortuguero, Caribbean of Costa Rica | -                             |                                                                             | -                     |                                                                             | -                     |                                                                             |
| Cm-ToT-19           | green ( <i>Chelonia mydas</i> ) | tissue rear flipper          | Tortuguero, Caribbean of Costa Rica | -                             |                                                                             | -                     |                                                                             | -                     |                                                                             |
| Cm-ToT-20           | green ( <i>Chelonia mydas</i> ) | tissue rear flipper          | Tortuguero, Caribbean of Costa Rica | -                             |                                                                             | -                     |                                                                             | -                     |                                                                             |
| Cm-ToT-21           | green ( <i>Chelonia mydas</i> ) | tissue rear flipper          | Tortuguero, Caribbean of Costa Rica | -                             |                                                                             | -                     |                                                                             | -                     |                                                                             |
| Cm-ToT-22           | green ( <i>Chelonia mydas</i> ) | tissue rear flipper          | Tortuguero, Caribbean of Costa Rica | -                             |                                                                             | -                     |                                                                             | -                     |                                                                             |
| Cm-ToT-23           | green ( <i>Chelonia mydas</i> ) | tissue rear flipper          | Tortuguero, Caribbean of Costa Rica | -                             |                                                                             | -                     |                                                                             | -                     |                                                                             |
| Cm-ToT-25           | green ( <i>Chelonia mydas</i> ) | tissue rear flipper          | Tortuguero, Caribbean of Costa Rica | -                             |                                                                             | -                     |                                                                             | -                     |                                                                             |
| Cm-ToT-26           | green ( <i>Chelonia mydas</i> ) | tissue rear flipper          | Tortuguero, Caribbean of Costa Rica | -                             |                                                                             | -                     |                                                                             | -                     |                                                                             |
| Cm-ToT-27           | green ( <i>Chelonia mydas</i> ) | tissue rear flipper          | Tortuguero, Caribbean of Costa Rica | -                             |                                                                             | -                     |                                                                             | -                     |                                                                             |
| Cm-ToT-28           | green ( <i>Chelonia mydas</i> ) | tissue rear flipper          | Tortuguero, Caribbean of Costa Rica | -                             |                                                                             | -                     |                                                                             | -                     |                                                                             |
| Cm-ToT-29           | green ( <i>Chelonia mydas</i> ) | tissue rear flipper          | Tortuguero, Caribbean of Costa Rica | -                             |                                                                             | -                     |                                                                             | -                     |                                                                             |
| Cm-ToT-30           | green ( <i>Chelonia mydas</i> ) | tissue rear flipper          | Tortuguero, Caribbean of Costa Rica | -                             |                                                                             | -                     |                                                                             | -                     |                                                                             |
| Cm-ToT-31           | green ( <i>Chelonia mydas</i> ) | tissue rear flipper          | Tortuguero, Caribbean of Costa Rica | -                             |                                                                             | -                     |                                                                             | -                     |                                                                             |
| Cm-ToT-32           | green ( <i>Chelonia mydas</i> ) | tissue rear flipper          | Tortuguero, Caribbean of Costa Rica | -                             |                                                                             | -                     |                                                                             | -                     |                                                                             |
| Cm-ToT-33           | green ( <i>Chelonia mydas</i> ) | tissue rear flipper          | Tortuguero, Caribbean of Costa Rica | -                             |                                                                             | -                     |                                                                             | -                     |                                                                             |
| Cm-ToT-34           | green ( <i>Chelonia mydas</i> ) | tissue rear flipper          | Tortuguero, Caribbean of Costa Rica | -                             |                                                                             | -                     |                                                                             | -                     |                                                                             |
| Cm-ToT-35           | green ( <i>Chelonia mydas</i> ) | tissue rear flipper          | Tortuguero, Caribbean of Costa Rica | -                             |                                                                             | +                     | R                                                                           | -                     |                                                                             |
| Cm-ToT-36           | green ( <i>Chelonia mydas</i> ) | tissue rear flipper          | Tortuguero, Caribbean of Costa Rica | -                             |                                                                             | +                     | R                                                                           | -                     |                                                                             |
| Cm-ToT-37           | green ( <i>Chelonia mydas</i> ) | tissue rear flipper          | Tortuguero, Caribbean of Costa Rica | -                             |                                                                             | +                     | R                                                                           | -                     |                                                                             |
| Cm-ToT-38           | green ( <i>Chelonia mydas</i> ) | tissue rear flipper          | Tortuguero, Caribbean of Costa Rica | -                             |                                                                             | +                     | R                                                                           | -                     |                                                                             |
| Cm-ToT-39           | green ( <i>Chelonia mydas</i> ) | tissue rear flipper          | Tortuguero, Caribbean of Costa Rica | -                             |                                                                             | +                     | R                                                                           | -                     |                                                                             |
| Cm-ToT-40           | green ( <i>Chelonia mydas</i> ) | tissue rear flipper          | Tortuguero, Caribbean of Costa Rica | -                             |                                                                             | +                     | R                                                                           | -                     |                                                                             |
| Cm-ToT-41           | green ( <i>Chelonia mydas</i> ) | tissue rear flipper          | Tortuguero, Caribbean of Costa Rica | -                             |                                                                             | -                     |                                                                             | -                     |                                                                             |
| Cm-TCFP-10          | green ( <i>Chelonia mydas</i> ) | tumours FP                   | Turks & Caicos Islands, Caribbean   | -                             |                                                                             | -                     |                                                                             | +                     | C                                                                           |
| Cm-TCFP-11          | green ( <i>Chelonia mydas</i> ) | tumours FP                   | Turks & Caicos Islands, Caribbean   | -                             |                                                                             | +                     | R                                                                           | -                     |                                                                             |
| Cm-TCFP-12          | green ( <i>Chelonia mydas</i> ) | tumours FP                   | Turks & Caicos Islands, Caribbean   | +                             | R                                                                           | +                     | R                                                                           | +                     | R                                                                           |
| Cm-TCFP-13          | green ( <i>Chelonia mydas</i> ) | tumours FP                   | Turks & Caicos Islands, Caribbean   | +                             | R                                                                           | +                     | R                                                                           | +                     | R                                                                           |
| Cm-TCFP-14          | green ( <i>Chelonia mydas</i> ) | tumours FP                   | Turks & Caicos Islands, Caribbean   | +                             | R                                                                           | +                     | R                                                                           | +                     | C                                                                           |
| Cm-TCFP-15          | green ( <i>Chelonia mydas</i> ) | tumours FP                   | Turks & Caicos Islands, Caribbean   | +                             | R                                                                           | +                     | R                                                                           | +                     | C                                                                           |
| Cm-TCFP-1Carapace   | green ( <i>Chelonia mydas</i> ) | tumours FP                   | Turks & Caicos Islands, Caribbean   | -                             |                                                                             | -                     |                                                                             | +                     | F                                                                           |
| Cm-TCFP-1cloaca1    | green ( <i>Chelonia mydas</i> ) | tumours FP                   | Turks & Caicos Islands, Caribbean   | -                             |                                                                             | +                     | R                                                                           | -                     |                                                                             |
| Cm-TCFP-1cloaca2    | green ( <i>Chelonia mydas</i> ) | tumours FP                   | Turks & Caicos Islands, Caribbean   | +                             | R                                                                           | -                     |                                                                             | -                     |                                                                             |
| Cm-TCFP-1cloaca4    | green ( <i>Chelonia mydas</i> ) | tumours FP                   | Turks & Caicos Islands, Caribbean   | +                             | R                                                                           | -                     |                                                                             | -                     |                                                                             |
| Cm-TCFP-1HL flipper | green ( <i>Chelonia mydas</i> ) | tumours FP                   | Turks & Caicos Islands, Caribbean   | -                             |                                                                             | +                     | R                                                                           | +                     | F                                                                           |
| Cm-TCFP-1L flipper1 | green ( <i>Chelonia mydas</i> ) | tumours FP                   | Turks & Caicos Islands, Caribbean   | -                             |                                                                             | +                     | R                                                                           | -                     |                                                                             |
| Cm-TCFP-1L flipper2 | green ( <i>Chelonia mydas</i> ) | tumours FP                   | Turks & Caicos Islands, Caribbean   | -                             |                                                                             | +                     | R                                                                           | -                     |                                                                             |
| Cm-TCFP-1RF flipper | green ( <i>Chelonia mydas</i> ) | tumours FP                   | Turks & Caicos Islands, Caribbean   | -                             |                                                                             | +                     | R                                                                           | +                     | C                                                                           |
| Cm-TCFP-1Rteye      | green ( <i>Chelonia mydas</i> ) | tumours FP                   | Turks & Caicos Islands, Caribbean   | -                             |                                                                             | +                     | R                                                                           | -                     |                                                                             |
| Cm-TCFP-2           | green ( <i>Chelonia mydas</i> ) | tumours FP                   | Turks & Caicos Islands, Caribbean   | -                             |                                                                             | +                     | R                                                                           | +                     | C                                                                           |
| Cm-TCFP-3           | green ( <i>Chelonia mydas</i> ) | tumours FP                   | Turks & Caicos Islands, Caribbean   | +                             | R                                                                           | +                     | R                                                                           | +                     | C                                                                           |
| Cm-TCFP-4           | green ( <i>Chelonia mydas</i> ) | tumours FP                   | Turks & Caicos Islands, Caribbean   | +                             | R                                                                           | +                     | R                                                                           | +                     | R                                                                           |
| Cm-TCFP-5           | green ( <i>Chelonia mydas</i> ) | tumours FP                   | Turks & Caicos Islands, Caribbean   | +                             | R                                                                           | +                     | R                                                                           | +                     | R                                                                           |
| Cm-TCFP-6           | green ( <i>Chelonia mydas</i> ) | tumours FP                   | Turks & Caicos Islands, Caribbean   | -                             |                                                                             | +                     | R                                                                           | -                     |                                                                             |
| Cm-TCFP-7           | green ( <i>Chelonia mydas</i> ) | tumours FP                   | Turks & Caicos Islands, Caribbean   | -                             |                                                                             | -                     |                                                                             | +                     | C                                                                           |
| Cm-TCFP-8           | green ( <i>Chelonia mydas</i> ) | tumours FP                   | Turks & Caicos Islands, Caribbean   | +                             | R                                                                           | +                     | R                                                                           | +                     | F                                                                           |
| Cm-TCFP-9           | green ( <i>Chelonia mydas</i> ) | tumours FP                   | Turks & Caicos Islands, Caribbean   | +                             | R                                                                           | +                     | R                                                                           | -                     |                                                                             |
| Cm-TCT-1RF flipper1 | green ( <i>Chelonia mydas</i> ) | tissue- suspected tumours FP | Turks & Caicos Islands, Caribbean   | -                             |                                                                             | -                     |                                                                             | -                     |                                                                             |
| Cm-TCT-8leeches     | green ( <i>Chelonia mydas</i> ) | tissue- suspected tumours FP | Turks & Caicos Islands, Caribbean   | -                             |                                                                             | -                     |                                                                             | -                     |                                                                             |
