# Supplementary material for: Global distribution of Chelonid fibropapilloma-associated herpesvirus among clinically healthy sea turtles
Source: PubMed Central journal article supplement (PMC4219010; doi:10.1186/s12862-014-0206-z), 2014-10-25
Supplement: 12862_2014_206_MOESM8_ESM.pdf [file 12862_2014_206_MOESM8_ESM.pdf]

| <b>Primer set</b> | <b>Targeted gene</b>     | <b>Primer sequence (5' to '3)</b>                                     | <b>Length of amplification<br/>(nucleotide bases)</b> |
|-------------------|--------------------------|-----------------------------------------------------------------------|-------------------------------------------------------|
| UL18              | Capsid protein gene UL18 | <b>F:</b> GTGGAACCCCGCCGGGTAAT<br><b>R:</b> TGATCCGGGCCGAGTAGCGG      | 140                                                   |
| UL22              | Glycoprotein H gene UL22 | <b>F:</b> AACGCCCTTTCCTCCGACCCATATT<br><b>R:</b> GCTGGGGGAGCATCGTGCAA | 179                                                   |
| UL27              | Glycoprotein B gene UL27 | <b>F:</b> CTAGATACATACTGGCCRTGCTCGTC<br><b>R:</b> GCCAGCGACCATCCGGAG  | 143                                                   |
